# Supplementary material
Source: PubMed Central journal article supplement (PMC7427345)
Supplement: NIHMS1612243-supplement-1.pdf [file NIHMS1612243-supplement-1.pdf]

1 **Supplemental figure legend**

2 *Supplemental figure 1.* Simultaneous knockout of *miR-206*, *miR-1a-1* and *miR-1a-2* genes in PAX7 positive  
3 murine myoblast doesn't block differentiation, but slightly decreases MHC protein level

4 A) qRT-PCR analysis of differentiating (DM3) control (Ctrl) and triple KO (tKO) PAX7 positive cells. Levels  
5 of pre-miRNAs were normalized to *Gapdh* and miRNAs – to *U6* snRNA. Levels are shown relative to control  
6 cells (Ctrl DM3). Values represent three biological replicates, presented as mean +/- SEM. Statistical  
7 significance was calculated using t-student test. (\*\*\*) indicates p-value =< 0.001.

8 B) qRT-PCR analysis of proliferating (GM) and differentiating (DM3) control (Ctrl) and triple KO (tKO) PAX7  
9 positive cells. Levels of *Myod1*, *Myogenin* and *Myh3* mRNAs were normalized to *Gapdh* and shown relative to  
10 control cells (Ctrl DM3). Box and whiskers plot from three biological replicates with black line representing the  
11 median. Statistical significance was calculated using t-student test.

12 C) Western blot of proliferating (GM) and differentiating (DM3, DM5) control (Ctrl) and triple KO (tKO)  
13 PAX7 positive cells. Protein levels for MYOGENIN and MHC were measured. HSP90 serves as a loading  
14 control.

15 D) Fusion index based on MHC immunofluorescence during differentiation time course of PAX7 positive  
16 control (Ctrl) and triple KO (tKO) cells. GM, DM1, DM3, DM5 and DM7 were analyzed. Statistical  
17 significance was calculated using t-student test.

18

19 *Supplemental figure 2.* Lack of *miR-206/-1a* leads to mitochondria function impairment in C2C12 cells

20 A) Top 10 significant Gene Ontology terms enriched in genes upregulated during differentiation of control cells  
21 (Ctrl). (\*\*\*) indicates padj =< 0.001

22 B) Top 10 significant Gene Ontology terms enriched in genes upregulated during differentiation of triple KO  
23 clones (tKO1 and tKO2). (\*\*\*) indicates padj =< 0.001

24

25 *Supplemental figure 3.* Differentially expressed miRNAs in triple KO cells do not share seed-sequence with  
26 *miR-206/-1a* and so are unlikely to repress *miR-206/-1a* targets.

27 A) qRT-PCR analysis of proliferating control (Ctrl) and triple KO (tKO) C2C12 PAX7 positive cells. Levels of  
28 mRNA of *miR-206/-1a* targets were normalized to *Gapdh* and shown relative to control cells. Values represent  
29 five biological replicates, presented as mean +/- SEM. Statistical significance was calculated using t-student  
30 test. (\*) indicates p-value =< 0.05.

31 B) qRT-PCR analysis of differentiating control (Ctrl) and triple KO (tKO) C2C12 PAX7 positive cells. Levels  
32 of mRNA of *miR-206/-1a* targets were normalized to *Gapdh* and shown relative to control cells. Values  
33 represent five biological replicates, presented as mean +/- SEM. Statistical significance was calculated using t-  
34 student test.

35 C) Representative Western blot of proliferating (GM) and differentiating (DM3) control (Ctrl) and triple KO  
36 (tKO) C2C12 PAX7 positive cells. Protein levels for DNA Pol alpha, NOTCH3, PAX7, CCND1 and IGFBP5  
37 were measured. HSP90 serves as a loading control.

38 D) miRNAs downregulated in proliferating triple KO C2C12 PAX7 negative clones versus control cells. padj  
39  $\leq 0.1$

40 E) miRNAs upregulated in proliferating triple KO C2C12 PAX7 negative clones versus control cells. padj  $\leq$   
41 0.1

42 F) miRNAs down- and upregulated in differentiating triple KO C2C12 PAX7 negative clones versus control  
43 cells. padj  $\leq 0.1$

44  
45 *Supplemental figure 4.* Mice with triple knockout of *miR-206*, *miR-1a-1* and *miR-1a-2* show high levels of heart  
46 fibrosis.

47 A) Quantification of average fiber size based on H&E staining on gastrocnemius muscles. Statistical  
48 significance was calculated using t-student test. (\*\*\*) indicates p-value  $\leq 0.001$ . N = 300 fibers per group.

49 B) Western blot of TA muscles of wild-type (WT) and triple KO (tKO) animals. Protein levels for NOTCH3,  
50 PAX7, CCND1 and IGFBP5 were measured. HSP90 serves as a loading control.

51 C) Heart weight from animals used in this study. Statistical significance was calculated using t-student test. N =  
52 5 for all group, except *miR-206&1-1&1-2* tKO, where N=2.

53 D) Representative picture of Masson's trichrome staining of heart section from WT, *miR-206 miR-1a-1* dKO,  
54 *miR-206 miR-1a-2* dKO and *miR-206 miR-1a-1 miR-1a-2* tKO mice. Black line = 100 $\mu$ m.

## 57 **Supplemental item titles**

58 *Table S1.* Oligonucleotides used in this study.

59 *Table S2.* Expression of *miR-206/1a* targets based on RNA-seq results.

60 *Table S3.* Expression of *miR-133* family based on small RNA-seq results.

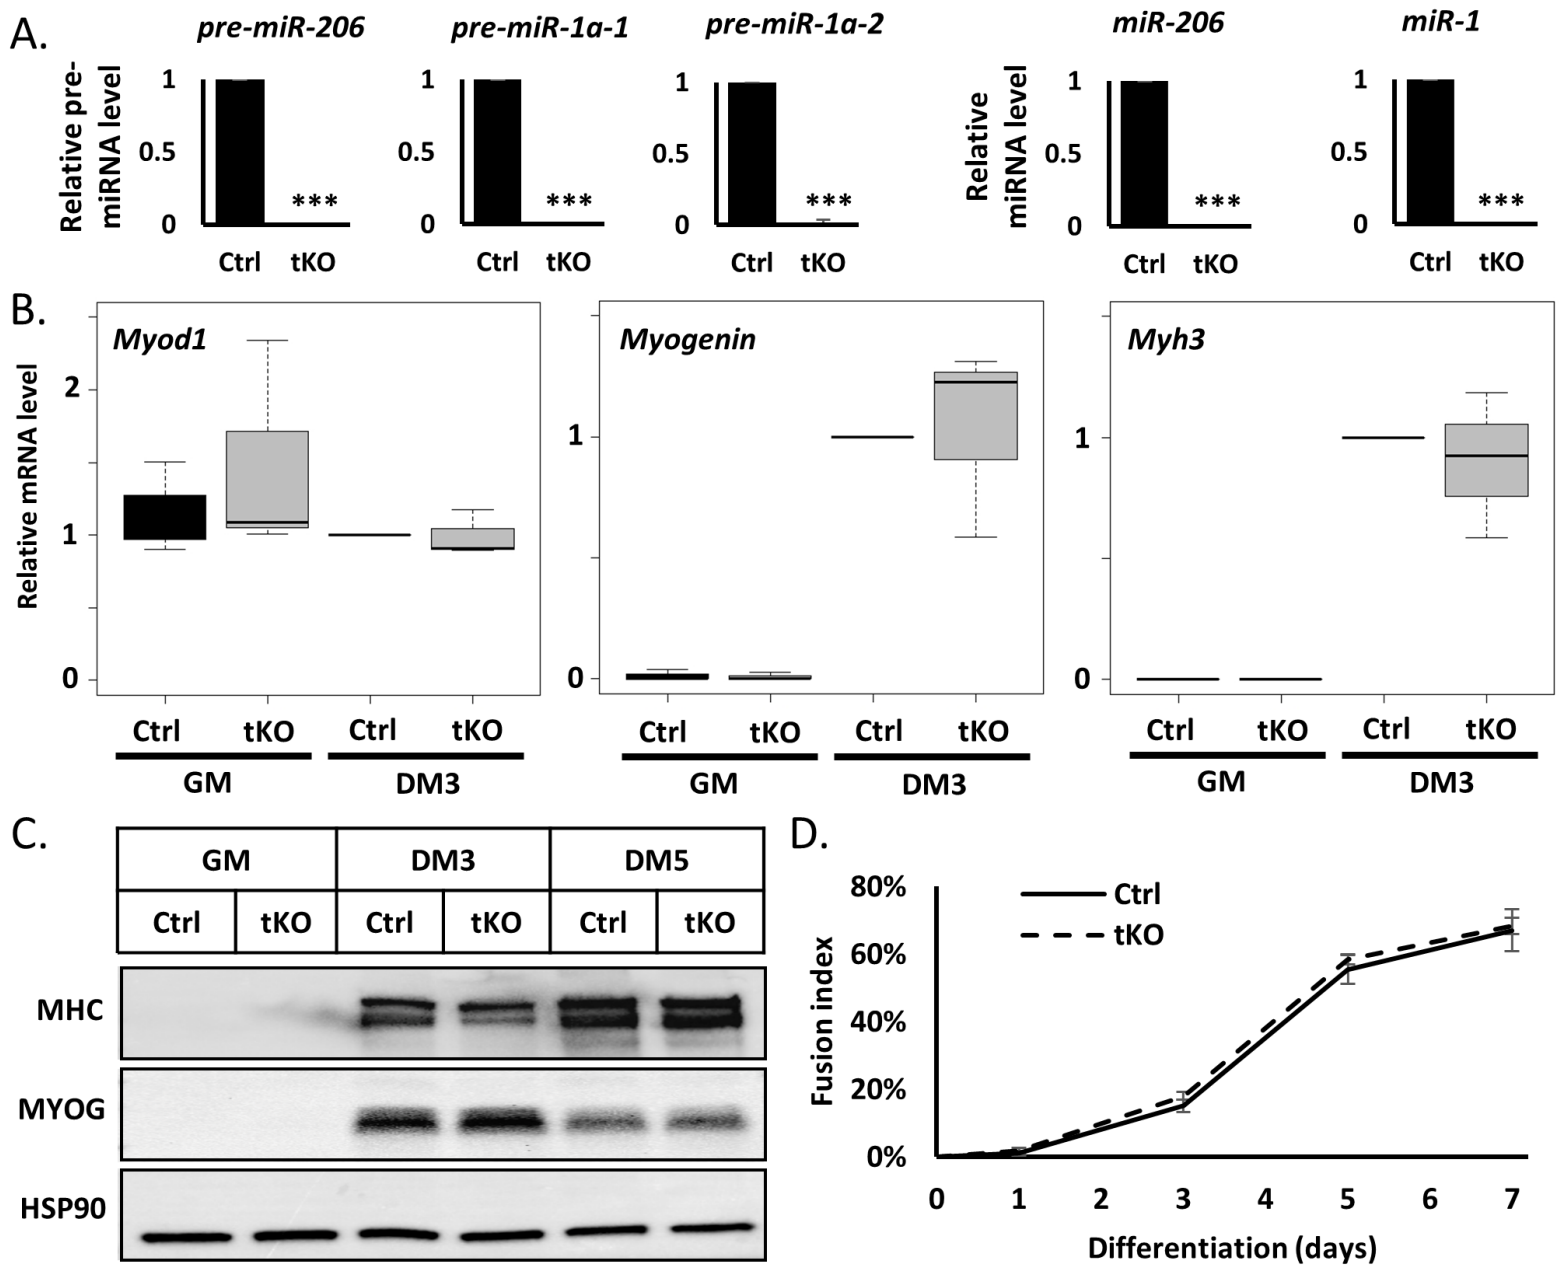

**FIGURE S1.**

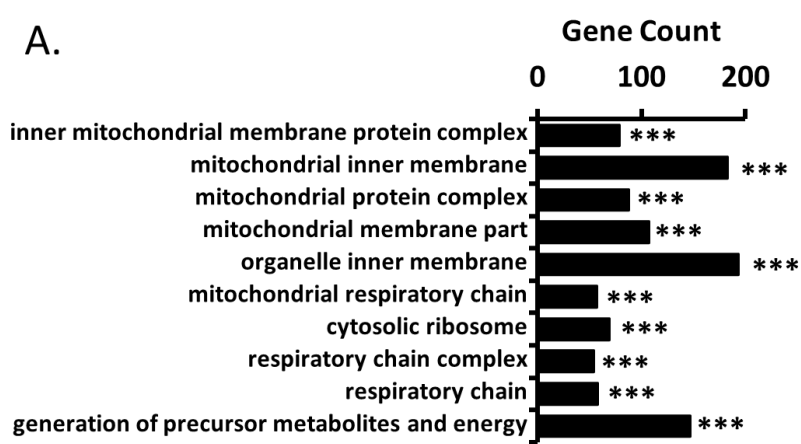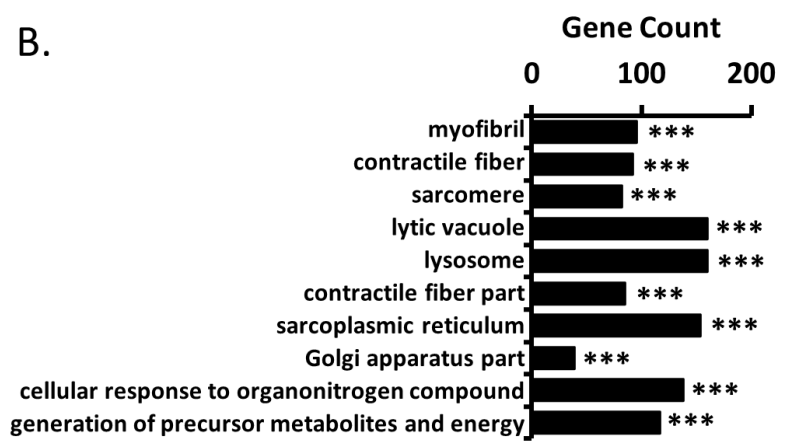

**FIGURE S2.**

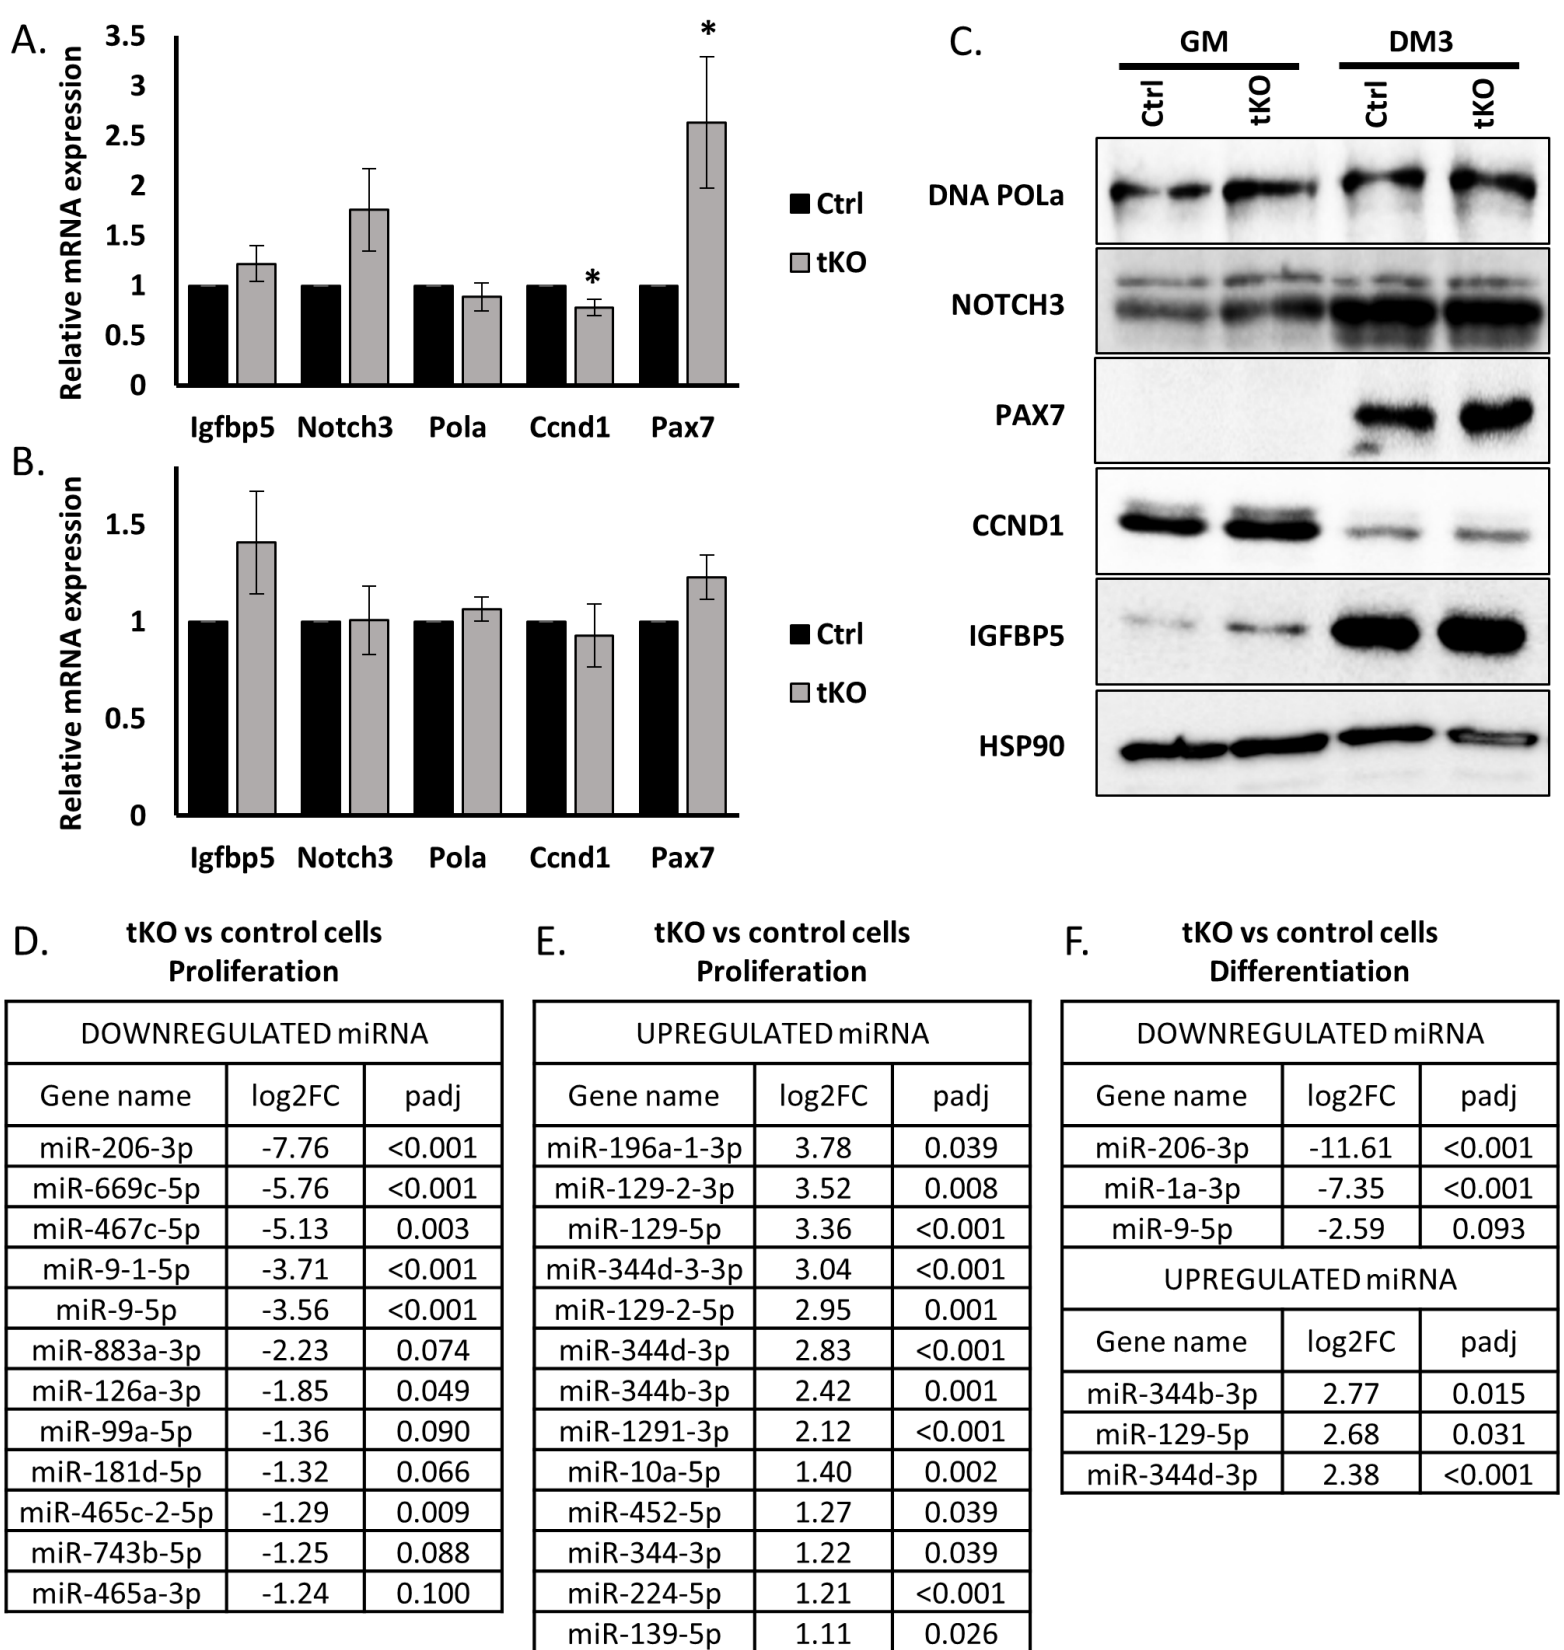

**FIGURE S3.**

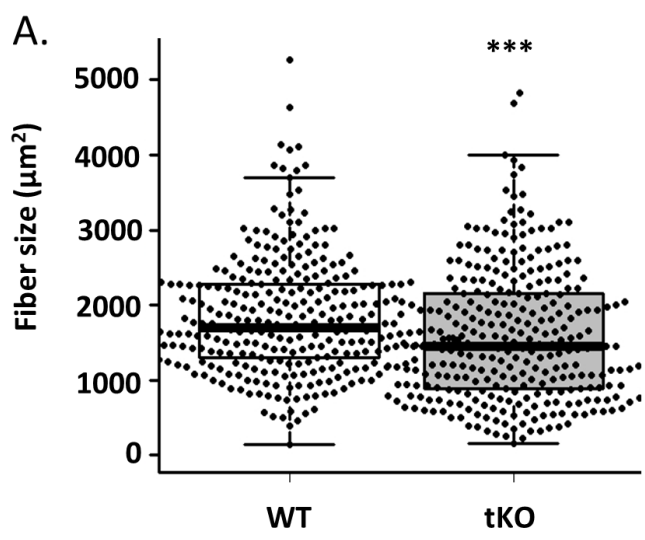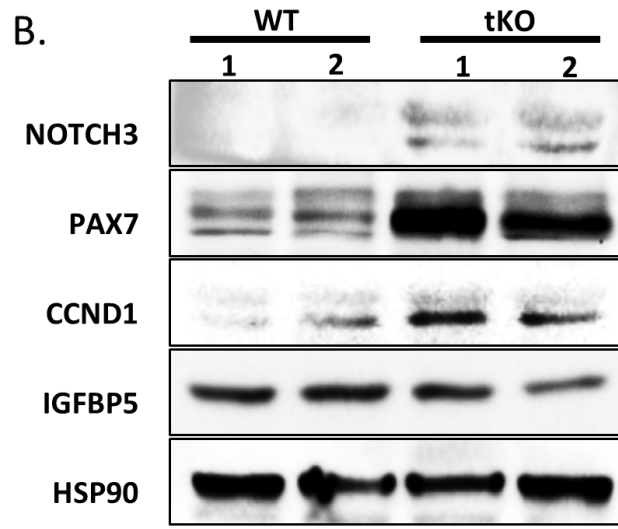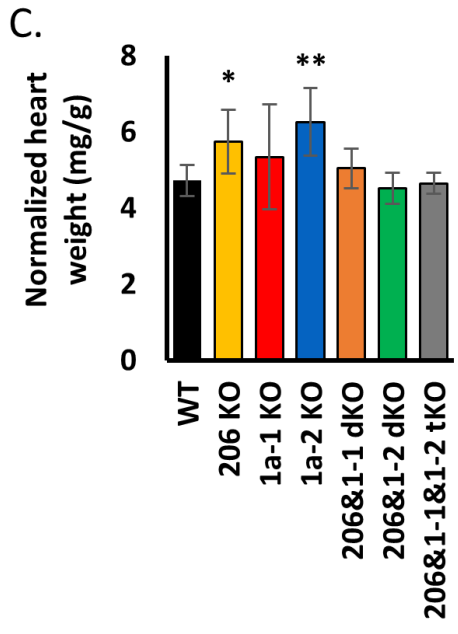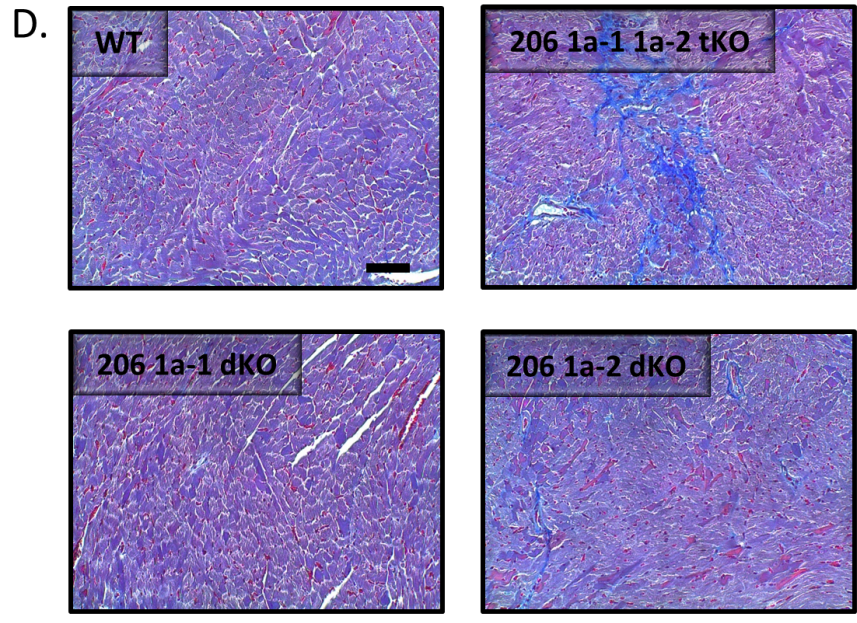

**FIGURE S4.**

| Primer name               | Sequence                        |
|---------------------------|---------------------------------|
| mmu-miR-206_sgRNA1        | CTGCGTGACAAGTGCCTCGG AGG        |
| mmu-miR-206_sgRNA2        | AAGTGCTTCTTCAAGGCCGA TGG        |
| mmu-miR-1a-1_sgRNA1       | TGCACAAGAACAGGACTCCG AGG        |
| mmu-miR-1a-1_sgRNA2       | GCATGGGCCACCCCTCAGTC TGG        |
| mmu-miR-1a-2_sgRNA1       | TCACAGCTATCGGCCGGCGC AGG        |
| mmu-miR-1a-2_sgRNA2       | GTCCGCCAAGAAGAAGCTAA AGG        |
| mmu_miR-206_PCR_F         | GATGAAGTCAGGTCCCAGAGA           |
| mmu_miR-206_PCR_R         | GCTTGCTTGGTAGAAACATCCA          |
| mmu-miR-1a-1_PCR_F        | GTAAGCAACGGTGGGGATGA            |
| mmu-miR-1a-1_PCR_R        | CACAGGCAAAGTGGCAGAAC            |
| mmu-miR-1a-2_PCR_F        | GGCATTGATGGGATCAGGT             |
| mmu-miR-1a-2_PCR_R        | GACTTATCTCTTCAGTACAGTATAAGGGATG |
| mmu-pre-miR-206-5p_qPCR   | CCAGGCCACATGCTTCTTT             |
| mmu-pre-miR-206-3p_qPCR   | CCACACACTTCCTTACATTCCA          |
| mmu-pre-miR-1a-1-5p_qPCR  | ACATACTTCTTTATATGCCATA          |
| mmu-pre-miR-1a-2-5p_qPCR  | ACATACTTCTTTATGTACCCATA         |
| mmu-pre-miR-1a-3p_qPCR    | ATACATACTTCTTTACATTCCA          |
| mmu-U6_qPCR               | CTGCGCAAGGATGACACGCA            |
| mmu-miR-206_qPCR          | TGGAATGTAAGGAAGTGTGTGG          |
| mmu-miR-1a_qPCR           | TGGAATGTAAGAAGTATGTAT           |
| mmu-Gapdh_qPCR_F          | GCACAGTCAAGGCCGAGAAT            |
| mmu-Gapdh_qPCR_R          | GCCTTCTCCATGGTGGTGAA            |
| mmu-Myod1_qPCR_F          | CATCCGCTACATCGAAGGTC            |
| mmu-Myod1_qPCR_R          | GTGGAGATGCGCTCCACTAT            |
| mmu-Myogenin_qPCR_F       | AGCGCAGGCTCAAGAAAGTGAATG        |
| mmu-Myogenin_qPCR_R       | CTGTAGGCGCTCAATGTACTGGAT        |
| mmu-Myh3_qPCR_F           | TCCAAACCGTCTCTGCACTGTT          |
| mmu-Myh3_qPCR_R           | AGCGTACAAAGTGTGGGTGTGT          |
| mmu_miR-206_PCR_MG_WT_F   | GATGAAGTCAGGTCCCAGAGA           |
| mmu_miR-206_PCR_MG_WT_R   | GCTTGCTTGGTAGAAACATCCA          |
| mmu_miR-206_PCR_MG_KO_F   | GCTCAAACCTGCAGAAGGATG           |
| mmu_miR-206_PCR_MG_KO_R   | GGTTCCGGATCCACTAGTTC            |
| mmu-miR-1a-1_PCR_MG_F     | GTAAGCAACGGTGGGGATGA            |
| mmu-miR-1a-1_PCR_MG_WT_R  | CACAGGCAAAGTGGCAGAAC            |
| mmu-miR-1a-1_PCR_MG_KO_R  | ACACCTAGGATAACTTCGTATAATGTATGCT |
| mmu-miR-1a-2_qPCR_MG_WT_F | CGGACATTACCTACCCAAAATACACT      |
| mmu-miR-1a-2_qPCR_MG_WT_R | GCCTACTCAGAGCACATACTTCTTT       |
| mmu-miR-1a-2_qPCR_MG_KO_F | CGATCGTAATCACCCGAGTGT           |
| mmu-miR-1a-2_qPCR_MG_KO_R | CCGTGGCCTGACTCATTCC             |
| mmu-Igfbp5_qPCR_F         | CAACGAAAAGAGCTACGGCG            |
| mmu-Igfbp5_qPCR_R         | ACCTTGGGGGAGTAGGTCTC            |
| mmu-Notch3_qPCR_F         | TGAACAACGTGGAGGCTACC            |
| mmu-Notch3_qPCR_R         | TTGGCGAGATGATCCAGCAG            |

|                  |                      |
|------------------|----------------------|
| mmu-Pola_qPCR_F  | CAACTTGTTGCAGTCGCCTT |
| mmu-Pola_qPCR_R  | GGTAAAAGCACAGCTGGGTG |
| mmu-Ccnd1_qPCR_F | CAAAATGCCAGAGGCGGATG |
| mmu-Ccnd1_qPCR_R | CATGGAGGGTGGGTTGGAAA |
| mmu-Pax7_qPCR_F  | TTCGAGAGGACCCACTACCC |
| mmu-Pax7_qPCR_R  | TTAGCTCCTGCCTGCTTACG |



| ensembl            | Target   | C_GM        | KO_GM       | C_DM        | KO_DM       |
|--------------------|----------|-------------|-------------|-------------|-------------|
| ENSMUSG00000000131 | Xpo6     | 19.44079668 | 19.33973107 | 7.517506934 | 12.14188931 |
| ENSMUSG00000000134 | Tfe3     | 11.64335593 | 8.881967456 | 10.13563387 | 12.60140252 |
| ENSMUSG00000000787 | Ddx3x    | 115.9988363 | 142.3963303 | 47.16917275 | 59.80754846 |
| ENSMUSG00000000826 | Dnajc5   | 22.80139496 | 22.03465707 | 12.64844858 | 16.0908902  |
| ENSMUSG00000000902 | Smarcb1  | 15.5189086  | 15.36618676 | 7.419438613 | 10.54368199 |
| ENSMUSG00000001089 | Luzp1    | 15.8974952  | 17.1780788  | 10.68349017 | 12.27225302 |
| ENSMUSG00000001098 | Kctd10   | 46.69890265 | 42.92598102 | 20.52764874 | 20.65192748 |
| ENSMUSG00000001100 | Poldip2  | 47.4430671  | 47.5145505  | 47.74070061 | 38.83129697 |
| ENSMUSG00000001105 | Ift20    | 37.56547016 | 39.03816854 | 44.44462809 | 54.30944609 |
| ENSMUSG00000001156 | Mxd1     | 1.402046774 | 1.208253291 | 4.623430024 | 4.594705751 |
| ENSMUSG00000001175 | Calm1    | 196.3907326 | 173.1971713 | 73.88058557 | 87.68085225 |
| ENSMUSG00000001280 | Sp1      | 16.01673974 | 13.31874188 | 18.60967857 | 16.15564352 |
| ENSMUSG00000001300 | Efnb2    | 11.84807681 | 19.37691758 | 6.768319095 | 17.01916031 |
| ENSMUSG00000001467 | Cyp51    | 40.89926143 | 30.52595101 | 159.0777211 | 238.1247587 |
| ENSMUSG00000002413 | Braf     | 4.174655778 | 4.438444335 | 3.971179912 | 6.164399266 |
| ENSMUSG00000002768 | Mea1     | 53.07189552 | 52.81526872 | 42.60240469 | 54.23609482 |
| ENSMUSG00000003032 | Klf4     | 9.710065302 | 7.529480122 | 19.06777296 | 15.85264603 |
| ENSMUSG00000003161 | Sri      | 39.45441251 | 37.70967904 | 16.77587823 | 35.05071275 |
| ENSMUSG00000003528 | Slc25a1  | 38.47730317 | 36.44050007 | 41.38426179 | 135.7938761 |
| ENSMUSG00000003847 | Nfat5    | 12.74210471 | 11.90011358 | 7.965558192 | 10.21252797 |
| ENSMUSG00000003948 | Mmd      | 48.98024959 | 61.36345323 | 12.17208265 | 32.31050367 |
| ENSMUSG00000004319 | Clcn3    | 5.503909636 | 6.30269078  | 3.537585859 | 6.933053154 |
| ENSMUSG00000004530 | Coro1c   | 44.9726194  | 40.98768901 | 13.03213934 | 18.35999093 |
| ENSMUSG00000004535 | Tax1bp1  | 38.32813814 | 38.47810617 | 21.08680317 | 26.38867298 |
| ENSMUSG00000004568 | Arhgef18 | 9.892225635 | 10.55119587 | 7.363597142 | 8.690181904 |
| ENSMUSG00000004849 | Ap1s1    | 144.7527854 | 129.0737113 | 66.86664643 | 76.56686504 |
| ENSMUSG00000005034 | Prkacb   | 24.57959513 | 22.26731921 | 23.80960763 | 23.96705284 |
| ENSMUSG00000005103 | Wdr1     | 194.6230659 | 244.8499253 | 93.93913712 | 119.8903404 |
| ENSMUSG00000005125 | Ndrp1    | 17.56681873 | 22.94806252 | 39.43543938 | 75.20601586 |
| ENSMUSG00000005299 | Letm1    | 17.43567679 | 17.59173661 | 8.236495809 | 10.49748224 |
| ENSMUSG00000005312 | Ubqln1   | 53.6112341  | 50.44223553 | 46.86330769 | 40.40312911 |
| ENSMUSG00000006273 | Atp6v1b2 | 51.93735079 | 45.79579936 | 55.71983033 | 50.10881145 |
| ENSMUSG00000006373 | Pgrmc1   | 93.50357884 | 102.0128266 | 44.43962813 | 80.78690817 |
| ENSMUSG00000006412 | Pfdn2    | 21.82395176 | 28.8716793  | 28.16780893 | 25.7280118  |
| ENSMUSG00000006445 | Epha2    | 57.99697145 | 92.87688443 | 34.80037306 | 42.81245779 |
| ENSMUSG00000006498 | Ptbp1    | 122.3259656 | 143.6002376 | 31.07730922 | 47.68658622 |
| ENSMUSG00000007476 | Lrrc8a   | 3.438756274 | 3.2535072   | 2.309614707 | 2.339574345 |
| ENSMUSG00000007670 | Khsrp    | 84.00945126 | 75.34037022 | 46.52965018 | 53.10274807 |
| ENSMUSG00000008301 | Phax     | 18.43591856 | 24.38255697 | 16.30542854 | 23.85897346 |
| ENSMUSG00000009376 | Met      | 15.00804626 | 16.10863617 | 7.823173801 | 10.79967321 |
| ENSMUSG00000009470 | Tnpo1    | 33.67376253 | 30.93935667 | 24.19176936 | 21.94528886 |
| ENSMUSG00000009555 | Cdk9     | 23.86737413 | 25.83012058 | 13.86212017 | 15.56991465 |
| ENSMUSG00000009905 | Kdsr     | 8.514938307 | 6.364418078 | 3.739384867 | 5.802447613 |
| ENSMUSG00000010461 | Eya4     | 8.214968964 | 7.873341382 | 11.3571641  | 11.24432409 |
| ENSMUSG00000011752 | Pgam1    | 312.357992  | 342.3860291 | 173.3823908 | 379.5063386 |
| ENSMUSG00000011877 | Git1     | 29.94581715 | 30.2181597  | 33.23104125 | 30.70396386 |

|                    |          |             |             |             |             |
|--------------------|----------|-------------|-------------|-------------|-------------|
| ENSMUSG00000013698 | Pea15a   | 113.0778737 | 137.3960499 | 99.6170886  | 99.99586864 |
| ENSMUSG00000013822 | Elof1    | 43.08215018 | 48.60543767 | 21.46038909 | 23.13186896 |
| ENSMUSG00000014303 | Glis2    | 17.20121695 | 25.76564006 | 24.89640896 | 38.36061979 |
| ENSMUSG00000014599 | Csf1     | 179.1709059 | 256.5467625 | 52.51836846 | 80.67585617 |
| ENSMUSG00000014932 | Yes1     | 5.873750124 | 6.737379991 | 5.952048642 | 7.954277067 |
| ENSMUSG00000015127 | Unkl     | 1.393195499 | 1.16739463  | 1.30738062  | 1.675740242 |
| ENSMUSG00000015501 | Hivep2   | 6.230784698 | 5.593804841 | 4.642869432 | 5.0396268   |
| ENSMUSG00000016559 | H3f3b    | 273.4933747 | 267.1062831 | 89.63333192 | 112.3697429 |
| ENSMUSG00000017386 | Traf4    | 23.48381108 | 25.24231257 | 50.68244482 | 43.43577841 |
| ENSMUSG00000017548 | Suz12    | 20.26745876 | 21.5479208  | 13.86893651 | 17.80196378 |
| ENSMUSG00000017858 | Ift52    | 14.63049675 | 13.02445418 | 16.44584781 | 16.1868803  |
| ENSMUSG00000018160 | Med1     | 13.46678856 | 13.19013435 | 8.961292222 | 9.369049368 |
| ENSMUSG00000018377 | Vezf1    | 22.64155016 | 20.47233188 | 15.30845825 | 17.63580402 |
| ENSMUSG00000018379 | Srsf1    | 52.45751853 | 54.73583073 | 6.741222361 | 8.328708862 |
| ENSMUSG00000018604 | Tbx3     | 2.581765636 | 1.631419354 | 2.429099271 | 1.350393763 |
| ENSMUSG00000018678 | Sp2      | 6.159090201 | 6.566645773 | 3.31060951  | 3.906561377 |
| ENSMUSG00000018750 | Zbtb4    | 8.722184603 | 5.438994065 | 10.33042404 | 10.71703919 |
| ENSMUSG00000018809 | Smyd4    | 15.25158947 | 14.58206385 | 6.015249968 | 7.287700345 |
| ENSMUSG00000018820 | Zfyve27  | 5.900466264 | 5.389066125 | 9.529930881 | 11.25419009 |
| ENSMUSG00000018846 | Pank3    | 15.285084   | 12.9504227  | 12.76313086 | 16.50944049 |
| ENSMUSG00000018999 | Slc35b4  | 13.5302406  | 12.93316366 | 3.123832756 | 6.733700693 |
| ENSMUSG00000019082 | Slc25a22 | 4.609890084 | 6.294501724 | 2.319143879 | 2.905715134 |
| ENSMUSG00000019189 | Rnf145   | 36.2593671  | 27.74264784 | 53.47060371 | 88.60801904 |
| ENSMUSG00000019802 | Sec63    | 26.38208384 | 26.50790228 | 27.39805618 | 30.71508525 |
| ENSMUSG00000019820 | Utrn     | 13.61823703 | 13.5820827  | 14.59832555 | 16.15393848 |
| ENSMUSG00000019951 | Uhrf1bp1 | 17.18705781 | 17.43537506 | 11.41551514 | 20.17912888 |
| ENSMUSG00000019978 | Epb4.1l2 | 54.23690393 | 51.55975598 | 47.90102332 | 63.28220855 |
| ENSMUSG00000020044 | Timp3    | 35.37245234 | 73.64392842 | 13.96386872 | 19.59588761 |
| ENSMUSG00000020048 | Hsp90b1  | 190.8011172 | 188.9486933 | 228.4756255 | 248.5261313 |
| ENSMUSG00000020070 | Rufy2    | 4.569638247 | 4.740997359 | 2.492064427 | 4.241476714 |
| ENSMUSG00000020100 | Slc29a3  | 9.864938673 | 8.150225098 | 2.437127829 | 7.466966635 |
| ENSMUSG00000020130 | Tbc1d15  | 20.50384438 | 21.47175882 | 22.05663214 | 22.01081501 |
| ENSMUSG00000020160 | Meis1    | 2.784865921 | 3.97315957  | 2.766608261 | 2.329875777 |
| ENSMUSG00000020170 | Frs2     | 25.51662152 | 22.37883593 | 13.66746979 | 16.70831617 |
| ENSMUSG00000020198 | Ap3d1    | 62.6766094  | 58.72762472 | 22.34550037 | 38.5430263  |
| ENSMUSG00000020422 | Tns3     | 60.11808586 | 63.87374629 | 20.6091627  | 25.35903695 |
| ENSMUSG00000020463 | Smek2    | 12.69220638 | 13.62816377 | 6.224443017 | 8.260900248 |
| ENSMUSG00000020572 | Nampt    | 16.80812384 | 19.88234669 | 12.8640051  | 15.41770283 |
| ENSMUSG00000020661 | Dnmt3a   | 3.165079292 | 2.479731109 | 6.350568585 | 6.568634176 |
| ENSMUSG00000020719 | Ddx5     | 180.0164159 | 191.7366626 | 75.94625483 | 88.17746137 |
| ENSMUSG00000020745 | Pafah1b1 | 33.17182893 | 34.40791782 | 26.54011523 | 27.49255345 |
| ENSMUSG00000020846 | Fam101b  | 7.876564838 | 10.22471092 | 5.225858057 | 6.823888023 |
| ENSMUSG00000020886 | Dlg4     | 8.911519414 | 6.470845932 | 35.19281816 | 27.13796048 |
| ENSMUSG00000020894 | Vamp2    | 11.81756276 | 13.75992726 | 12.40580457 | 14.86877783 |
| ENSMUSG00000020973 | Dnaaf2   | 8.799667822 | 8.757293313 | 2.914847599 | 2.930828812 |
| ENSMUSG00000021112 | Mpp5     | 4.925284812 | 6.478071686 | 7.739128052 | 9.118799972 |
| ENSMUSG00000021127 | Zfp36l1  | 5.731804285 | 4.384847517 | 20.79191984 | 18.89412362 |

|                    |          |             |             |             |             |
|--------------------|----------|-------------|-------------|-------------|-------------|
| ENSMUSG00000021156 | Zmynd11  | 24.99347881 | 21.9311419  | 16.13614485 | 15.43924778 |
| ENSMUSG00000021188 | Trip11   | 4.925123087 | 4.81831273  | 2.135768169 | 3.428178056 |
| ENSMUSG00000021275 | Tecpr2   | 3.688861674 | 3.586011931 | 3.306541101 | 3.144263937 |
| ENSMUSG00000021367 | Edn1     | 1.932907631 | 4.592516659 | 3.840172775 | 5.649617759 |
| ENSMUSG00000021468 | Sptlc1   | 20.25297731 | 15.90390908 | 8.359152319 | 11.05933828 |
| ENSMUSG00000021546 | Hnrnpk   | 212.2048066 | 220.3276581 | 102.7754176 | 106.5290964 |
| ENSMUSG00000021549 | Rasa1    | 16.00025597 | 10.81866929 | 4.588084811 | 5.831377022 |
| ENSMUSG00000021670 | Hmgcr    | 23.63166275 | 15.4570261  | 27.24937179 | 34.65528292 |
| ENSMUSG00000021693 | Kif2a    | 13.38533159 | 12.79095849 | 7.839345223 | 7.225058696 |
| ENSMUSG00000021745 | Ptprg    | 8.888918112 | 6.884418599 | 6.7177981   | 8.987599293 |
| ENSMUSG00000021767 | Kat6b    | 5.632222365 | 3.872282643 | 4.008753949 | 3.85724399  |
| ENSMUSG00000021877 | Arf4     | 102.4395961 | 113.9200517 | 99.82086839 | 121.8962619 |
| ENSMUSG00000021890 | Eaf1     | 22.33335402 | 30.48490071 | 12.54954938 | 22.01870972 |
| ENSMUSG00000021895 | Arhgef3  | 3.45075786  | 3.017827826 | 4.680026394 | 4.591032524 |
| ENSMUSG00000022003 | Slc25a30 | 20.00952956 | 19.4656944  | 48.66510958 | 52.32157585 |
| ENSMUSG00000022016 | Akap11   | 9.283812149 | 8.518245635 | 6.813354519 | 8.412496644 |
| ENSMUSG00000022119 | Rbm26    | 13.48586484 | 13.4474989  | 8.189823127 | 9.27368941  |
| ENSMUSG00000022178 | Ajuba    | 50.1191038  | 70.5992695  | 18.04665568 | 25.94160325 |
| ENSMUSG00000022200 | Golph3   | 33.58000963 | 31.85664514 | 39.86526998 | 34.3632198  |
| ENSMUSG00000022285 | Ywhaz    | 177.4667706 | 163.1639139 | 73.66960992 | 116.7928642 |
| ENSMUSG00000022353 | Mtss1    | 17.93813564 | 15.60999751 | 27.75098554 | 25.14173174 |
| ENSMUSG00000022390 | Zc3h7b   | 35.04938031 | 29.97385315 | 28.1887019  | 27.32635043 |
| ENSMUSG00000022401 | Xpnpep3  | 8.111169141 | 6.705867529 | 4.917809086 | 4.29776232  |
| ENSMUSG00000022426 | Josd1    | 28.781719   | 25.54343611 | 29.82077877 | 29.06217981 |
| ENSMUSG00000022451 | Twf1     | 42.79917886 | 38.44984431 | 12.34441986 | 28.70021724 |
| ENSMUSG00000022462 | Slc38a2  | 101.2389255 | 75.83168233 | 58.69383632 | 53.65939868 |
| ENSMUSG00000022676 | Snai2    | 10.8397059  | 13.16055245 | 13.12119124 | 22.46318783 |
| ENSMUSG00000022752 | Tom70a   | 48.92791392 | 54.48248267 | 27.08164296 | 24.90883357 |
| ENSMUSG00000022770 | Dlg1     | 23.04250282 | 33.42181521 | 21.34013687 | 27.54863246 |
| ENSMUSG00000022811 | Zfp148   | 8.363238296 | 9.946292029 | 4.936274149 | 6.79912987  |
| ENSMUSG00000022836 | Mylk     | 3.503840245 | 2.281037763 | 12.54964325 | 20.27263181 |
| ENSMUSG00000022858 | Tra2b    | 41.8068367  | 46.95265045 | 6.929094538 | 9.226347206 |
| ENSMUSG00000022960 | Donson   | 5.420377218 | 5.997313126 | 1.318382598 | 1.36944313  |
| ENSMUSG00000023025 | Larp4    | 23.61536711 | 25.66303154 | 9.078397523 | 10.39165526 |
| ENSMUSG00000023951 | Vegfa    | 39.55429528 | 36.39705188 | 46.15739241 | 46.11379249 |
| ENSMUSG00000024048 | Myl12a   | 288.3635222 | 388.4826026 | 343.4197844 | 363.4336604 |
| ENSMUSG00000024069 | Slc30a6  | 7.11028056  | 7.706966716 | 4.151254687 | 4.44010933  |
| ENSMUSG00000024074 | Crim1    | 18.17490084 | 25.01333486 | 8.394334117 | 8.766647619 |
| ENSMUSG00000024081 | Cebpz    | 13.16411348 | 15.03928288 | 5.36256679  | 6.619480275 |
| ENSMUSG00000024242 | Map4k3   | 5.33456566  | 5.136084754 | 4.394609142 | 6.112074515 |
| ENSMUSG00000024317 | Rnf138   | 3.761823138 | 4.847178126 | 4.308195568 | 4.390796665 |
| ENSMUSG00000024472 | Dcp2     | 4.711918696 | 6.48264412  | 3.46066599  | 5.012635195 |
| ENSMUSG00000024487 | Yipf5    | 29.2009261  | 37.22551132 | 33.46280435 | 44.42149826 |
| ENSMUSG00000024491 | Rbm27    | 8.650173653 | 12.76853337 | 3.536144772 | 4.519824003 |
| ENSMUSG00000024589 | Nedd4l   | 5.455584023 | 9.847257074 | 5.330282344 | 5.480725726 |
| ENSMUSG00000024594 | Prrc1    | 13.48370531 | 16.33370313 | 31.0221598  | 39.22317533 |
| ENSMUSG00000024603 | Dctn4    | 27.82217491 | 30.81374305 | 29.6239501  | 35.38906823 |

|                    |          |             |             |             |             |
|--------------------|----------|-------------|-------------|-------------|-------------|
| ENSMUSG00000024639 | Gnaq     | 16.38938135 | 13.54700908 | 7.696604081 | 8.975104529 |
| ENSMUSG00000024695 | Zfp91    | 43.69572219 | 40.55650027 | 62.14543837 | 52.9477403  |
| ENSMUSG00000024811 | Tnks2    | 29.31280935 | 26.45629438 | 22.72651145 | 24.80382836 |
| ENSMUSG00000024816 | Frmd8    | 21.75324364 | 17.2050425  | 11.99647162 | 13.93369127 |
| ENSMUSG00000024835 | Coro1b   | 150.1517539 | 121.1060306 | 141.0563503 | 162.0884219 |
| ENSMUSG00000024948 | Map4k2   | 5.1571712   | 3.983527169 | 4.658069879 | 6.710162115 |
| ENSMUSG00000024975 | Pdcd4    | 3.929584492 | 2.180751138 | 11.72937824 | 18.03158364 |
| ENSMUSG00000024985 | Tcf7l2   | 5.679969069 | 4.773281989 | 3.847178251 | 4.00550585  |
| ENSMUSG00000025019 | Lcor     | 1.947732559 | 2.107879579 | 1.123100931 | 1.47578306  |
| ENSMUSG00000025041 | Nt5c2    | 12.69751217 | 14.09159227 | 6.118748475 | 8.653407224 |
| ENSMUSG00000025192 | Entpd7   | 4.331004637 | 3.456937455 | 2.096552295 | 3.056208726 |
| ENSMUSG00000025234 | Arih1    | 17.45473357 | 19.11413181 | 21.97950448 | 24.00375677 |
| ENSMUSG00000025236 | Adpgk    | 15.01349036 | 15.1958662  | 7.77434009  | 13.5896202  |
| ENSMUSG00000025255 | Zfhx4    | 5.229640804 | 5.235252271 | 2.363504025 | 4.230231483 |
| ENSMUSG00000025314 | Ptprj    | 4.232155095 | 4.265060913 | 2.160491979 | 4.00809231  |
| ENSMUSG00000025332 | Kdm5c    | 40.2347084  | 34.65327581 | 35.90787147 | 38.59010992 |
| ENSMUSG00000025437 | Usp33    | 12.17152581 | 11.83943652 | 7.041908547 | 9.803483534 |
| ENSMUSG00000025511 | Tspan4   | 87.42766613 | 86.74887235 | 35.93015467 | 29.49593546 |
| ENSMUSG00000025578 | Cbx8     | 5.278815204 | 5.053386523 | 3.500202776 | 4.290006448 |
| ENSMUSG00000025586 | Cpeb1    | 1.952346749 | 1.809211027 | 4.036019905 | 4.354479941 |
| ENSMUSG00000025626 | Phf6     | 13.8664771  | 13.70405285 | 5.059563411 | 6.807270213 |
| ENSMUSG00000025810 | Nrp1     | 22.14969366 | 20.806093   | 10.28710088 | 15.61666508 |
| ENSMUSG00000025856 | Pdgfa    | 65.62516062 | 52.63657403 | 33.74721698 | 29.98597007 |
| ENSMUSG00000025862 | Stag2    | 15.28187249 | 14.29069372 | 10.26284529 | 11.05459815 |
| ENSMUSG00000025867 | Cplx2    | 7.456018475 | 5.905050766 | 2.535723011 | 4.306309132 |
| ENSMUSG00000025870 | Arl10    | 10.59213082 | 10.21009615 | 7.83292136  | 7.528600603 |
| ENSMUSG00000025873 | Faf2     | 26.36171831 | 21.1372463  | 18.18411422 | 18.21336976 |
| ENSMUSG00000025969 | Nrp2     | 81.1275456  | 69.17143927 | 70.57076063 | 85.39682652 |
| ENSMUSG00000025980 | Hspd1    | 268.8057457 | 363.7183904 | 87.2873701  | 103.0779209 |
| ENSMUSG00000025986 | Slc39a10 | 8.693243302 | 8.31523417  | 6.507153415 | 7.395502415 |
| ENSMUSG00000026017 | Carf     | 1.536738953 | 1.190430312 | 1.463432145 | 1.670262011 |
| ENSMUSG00000026028 | Trak2    | 17.4421253  | 17.88555454 | 11.33552738 | 12.62898701 |
| ENSMUSG00000026111 | Unc50    | 16.54303747 | 18.52820364 | 12.85196999 | 16.62507946 |
| ENSMUSG00000026155 | Smap1    | 9.465670544 | 8.794523469 | 9.584967015 | 10.92635018 |
| ENSMUSG00000026185 | Igfbp5   | 2.5308487   | 2.531456665 | 321.1033111 | 365.6941892 |
| ENSMUSG00000026193 | Fn1      | 510.8951268 | 549.7453616 | 1730.264749 | 1593.708613 |
| ENSMUSG00000026234 | Ncl      | 212.9555674 | 259.2774819 | 52.67337414 | 58.46685952 |
| ENSMUSG00000026238 | Ptma     | 1652.407253 | 1533.289796 | 270.7389649 | 457.9663318 |
| ENSMUSG00000026305 | Lrrfip1  | 59.22496573 | 89.34658984 | 26.88681086 | 32.51987174 |
| ENSMUSG00000026313 | Hdac4    | 4.009285667 | 3.484298072 | 7.088913161 | 7.139012678 |
| ENSMUSG00000026384 | Ptpn4    | 1.752900806 | 2.274237041 | 2.512766273 | 4.379247286 |
| ENSMUSG00000026425 | Srgap2   | 8.425696763 | 7.826067162 | 11.03697252 | 10.85721842 |
| ENSMUSG00000026434 | Nucks1   | 48.76348389 | 48.17978534 | 15.75104898 | 17.55276749 |
| ENSMUSG00000026470 | Stx6     | 24.6324381  | 22.3240218  | 24.7792906  | 26.49713513 |
| ENSMUSG00000026547 | Tagln2   | 283.9734907 | 489.7719279 | 63.34915585 | 120.6551337 |
| ENSMUSG00000026604 | Ptpn14   | 24.88702997 | 20.96657435 | 20.8115268  | 22.75475461 |
| ENSMUSG00000026617 | Bpnt1    | 14.58476203 | 17.9571465  | 7.010574968 | 7.50989034  |

|                    |          |             |             |             |             |
|--------------------|----------|-------------|-------------|-------------|-------------|
| ENSMUSG00000026618 | lars2    | 21.41766051 | 19.08406615 | 12.00273348 | 10.05544025 |
| ENSMUSG00000026626 | Ppp2r5a  | 30.02237587 | 24.9950104  | 26.49028986 | 31.06537844 |
| ENSMUSG00000026643 | Nmt2     | 19.47453995 | 21.20503419 | 18.0115865  | 19.20441329 |
| ENSMUSG00000026667 | Uhmk1    | 18.44629488 | 17.43588177 | 4.886353873 | 14.60004173 |
| ENSMUSG00000026696 | Vamp4    | 8.611876502 | 8.04421191  | 14.88627868 | 16.36675138 |
| ENSMUSG00000026775 | Yme1l1   | 31.50980773 | 29.15426678 | 29.67525816 | 27.83472932 |
| ENSMUSG00000026819 | Slc25a25 | 4.705610049 | 5.900406705 | 10.92980051 | 8.985961244 |
| ENSMUSG00000026827 | Gpd2     | 22.68084081 | 20.48441658 | 8.817218193 | 12.748471   |
| ENSMUSG00000026843 | Fubp3    | 26.68324763 | 28.85499399 | 9.241670066 | 14.500831   |
| ENSMUSG00000026858 | Fam73b   | 9.081568168 | 9.775980337 | 3.124528337 | 5.344142175 |
| ENSMUSG00000027030 | Stk39    | 11.02366532 | 17.25757124 | 7.867873786 | 9.149383248 |
| ENSMUSG00000027104 | Atf2     | 11.6941292  | 11.1539397  | 7.490855893 | 7.154054158 |
| ENSMUSG00000027162 | Lin7c    | 24.59073518 | 24.80973056 | 13.13879401 | 17.74463829 |
| ENSMUSG00000027177 | Hipk3    | 20.87290129 | 17.41898969 | 9.451684165 | 11.36397819 |
| ENSMUSG00000027184 | Caprin1  | 121.5592567 | 107.3785752 | 45.64360968 | 50.73697675 |
| ENSMUSG00000027189 | Trim44   | 6.351580074 | 4.92374438  | 4.631904741 | 5.247712221 |
| ENSMUSG00000027193 | Api5     | 51.10874413 | 50.48728813 | 22.00194148 | 25.84709333 |
| ENSMUSG00000027244 | Atg13    | 11.03341577 | 8.85419414  | 31.06954351 | 24.51061383 |
| ENSMUSG00000027254 | Map1a    | 22.00767913 | 16.17526917 | 33.23075037 | 42.80820662 |
| ENSMUSG00000027303 | Ptptra   | 24.98208823 | 20.09657084 | 29.63651491 | 32.83705063 |
| ENSMUSG00000027351 | Spred1   | 14.14583191 | 11.14777397 | 6.447307078 | 8.1319007   |
| ENSMUSG00000027367 | Stard7   | 30.93357457 | 30.62300792 | 18.8206894  | 22.21582585 |
| ENSMUSG00000027495 | Fam210b  | 3.574126427 | 2.413766711 | 4.453302453 | 5.845360935 |
| ENSMUSG00000027540 | Ptpn1    | 24.83298835 | 18.72692182 | 13.77081516 | 16.55556546 |
| ENSMUSG00000027552 | E2f5     | 7.779873073 | 10.39980877 | 8.175680893 | 17.88148767 |
| ENSMUSG00000027580 | Helz2    | 2.718072437 | 2.513446616 | 1.005416614 | 1.769919201 |
| ENSMUSG00000027634 | Ndrp3    | 18.74699003 | 17.74036157 | 37.22797437 | 46.39745217 |
| ENSMUSG00000027646 | Src      | 23.24791779 | 30.78851851 | 19.13255199 | 23.4004696  |
| ENSMUSG00000027652 | Ralgapb  | 14.85744589 | 12.78547077 | 8.77484019  | 11.65110373 |
| ENSMUSG00000027663 | Zmat3    | 24.37216372 | 20.91082813 | 22.49486284 | 21.09191739 |
| ENSMUSG00000027678 | Ncoa3    | 7.272317655 | 6.010549628 | 4.610489725 | 4.050453833 |
| ENSMUSG00000027684 | Mecom    | 2.619272857 | 3.545954174 | 1.458249106 | 2.135620717 |
| ENSMUSG00000027695 | Pld1     | 4.028671515 | 2.794586904 | 3.042167614 | 3.921252062 |
| ENSMUSG00000027706 | Sec62    | 29.03834431 | 28.51355335 | 32.73957751 | 31.89596678 |
| ENSMUSG00000027778 | Ift80    | 5.596907869 | 5.093688747 | 3.532034745 | 4.897539527 |
| ENSMUSG00000027784 | Ppm1l    | 11.37016883 | 9.792732101 | 7.695131938 | 8.247282798 |
| ENSMUSG00000027808 | Serp1    | 82.71328885 | 87.28118135 | 104.3631866 | 134.1317723 |
| ENSMUSG00000027835 | Pdcd10   | 13.06294993 | 15.99867941 | 9.105635486 | 10.5514535  |
| ENSMUSG00000027859 | Ngf      | 12.32283626 | 44.21139391 | 6.080162318 | 8.1470602   |
| ENSMUSG00000027879 | Sec22b   | 25.20651177 | 27.01888587 | 39.95744045 | 43.94415946 |
| ENSMUSG00000027951 | Adar     | 11.54132008 | 12.65916271 | 4.040802871 | 5.760604829 |
| ENSMUSG00000027985 | Lef1     | 2.293299641 | 1.823772653 | 3.444270347 | 1.782865043 |
| ENSMUSG00000027993 | Trim2    | 6.84561183  | 6.147966687 | 3.525856698 | 5.953420852 |
| ENSMUSG00000028034 | Fubp1    | 14.45417976 | 19.39835416 | 5.917545066 | 6.360679544 |
| ENSMUSG00000028042 | Zbtb7b   | 21.93767674 | 22.6840199  | 37.77062951 | 46.6556016  |
| ENSMUSG00000028053 | Ash1l    | 9.522217261 | 9.217755783 | 3.852192253 | 4.757618855 |
| ENSMUSG00000028086 | Fbxw7    | 5.739205227 | 6.253388641 | 3.687041456 | 4.443295452 |

|                    |          |             |             |             |             |
|--------------------|----------|-------------|-------------|-------------|-------------|
| ENSMUSG00000028156 | Eif4e    | 46.97791597 | 54.92838921 | 29.01273758 | 29.47128094 |
| ENSMUSG00000028249 | Sdcbp    | 53.3722863  | 58.11999157 | 36.95804693 | 58.97586172 |
| ENSMUSG00000028271 | Gtf2b    | 19.19131132 | 23.04487423 | 10.00559283 | 13.72070867 |
| ENSMUSG00000028274 | Rngtt    | 4.840539975 | 5.7460659   | 3.812829563 | 4.70203754  |
| ENSMUSG00000028333 | Anp32b   | 190.0790556 | 250.2194795 | 75.31448148 | 84.14358669 |
| ENSMUSG00000028399 | Ptprd    | 1.73450031  | 2.251254236 | 2.881856872 | 6.200102828 |
| ENSMUSG00000028412 | Slc44a1  | 25.01566198 | 22.22913522 | 26.67549605 | 26.18313863 |
| ENSMUSG00000028487 | Bnc2     | 4.392244597 | 4.068854509 | 4.137626067 | 3.979741724 |
| ENSMUSG00000028525 | Pde4b    | 3.982955771 | 3.450171334 | 2.424850352 | 1.561428162 |
| ENSMUSG00000028578 | Caap1    | 3.370404194 | 4.332851645 | 2.047846751 | 3.084682329 |
| ENSMUSG00000028583 | Pdpn     | 92.21710722 | 77.96978247 | 90.82893382 | 130.7247416 |
| ENSMUSG00000028656 | Cap1     | 155.0941754 | 201.9325815 | 71.58236986 | 123.3632105 |
| ENSMUSG00000028759 | Hp1bp3   | 29.18516472 | 24.57139182 | 21.26749455 | 22.27069139 |
| ENSMUSG00000028796 | Phc2     | 36.25593317 | 43.78974174 | 20.66633446 | 24.72031173 |
| ENSMUSG00000028843 | Sh3bgrl3 | 49.60135711 | 60.66652597 | 43.85062473 | 60.12787245 |
| ENSMUSG00000028868 | Wasf2    | 28.92736574 | 26.40206753 | 27.35466933 | 35.14696393 |
| ENSMUSG00000028926 | Cdk14    | 15.59603598 | 12.37862304 | 14.08562268 | 18.73476756 |
| ENSMUSG00000028957 | Per3     | 1.446053406 | 1.089023557 | 4.17258298  | 4.015739971 |
| ENSMUSG00000028995 | Fam126a  | 14.73585723 | 9.501256954 | 11.59952927 | 10.79365439 |
| ENSMUSG00000029004 | Kmt2e    | 15.69371804 | 13.18360189 | 6.42747279  | 9.789784719 |
| ENSMUSG00000029063 | Nadk     | 68.03813405 | 77.76690084 | 28.99132933 | 41.74633402 |
| ENSMUSG00000029090 | Gpr125   | 21.20059457 | 18.96701301 | 9.80244909  | 17.56053788 |
| ENSMUSG00000029169 | Dhx15    | 58.40543375 | 78.25903369 | 18.02184703 | 23.50752922 |
| ENSMUSG00000029196 | Tada2b   | 12.27920991 | 13.56462916 | 4.34809534  | 6.192549827 |
| ENSMUSG00000029208 | Guf1     | 4.586160775 | 3.615318258 | 2.893720681 | 2.47667273  |
| ENSMUSG00000029221 | Slc30a9  | 15.41743268 | 13.61103721 | 17.93483815 | 16.07358724 |
| ENSMUSG00000029238 | Clock    | 11.66017929 | 10.91398894 | 4.751307182 | 4.806713458 |
| ENSMUSG00000029270 | Fam69a   | 4.360897267 | 4.319675198 | 6.403268608 | 11.1478567  |
| ENSMUSG00000029287 | Tgfbr3   | 7.583258077 | 4.917028283 | 5.778322244 | 4.922933386 |
| ENSMUSG00000029290 | Zfp326   | 7.777955205 | 7.729029269 | 1.971320178 | 1.904958617 |
| ENSMUSG00000029405 | G3bp2    | 19.28362316 | 16.5836119  | 7.362454766 | 8.556498884 |
| ENSMUSG00000029438 | Bcl7a    | 3.25685322  | 2.457088707 | 3.528527957 | 3.138547828 |
| ENSMUSG00000029461 | Fam168a  | 19.21651908 | 14.01505299 | 17.76337546 | 20.34603456 |
| ENSMUSG00000029538 | Srsf9    | 76.15677666 | 76.40747175 | 24.74988427 | 46.16241432 |
| ENSMUSG00000029580 | Actb     | 2552.09836  | 2769.754359 | 526.202166  | 714.9247083 |
| ENSMUSG00000029617 | Ccz1     | 33.15159963 | 32.38480347 | 23.70044082 | 24.13733062 |
| ENSMUSG00000029684 | Wasl     | 16.13628187 | 20.07589602 | 18.37039735 | 19.09053717 |
| ENSMUSG00000029787 | Avl9     | 4.411128435 | 3.889996025 | 3.156077433 | 4.596689219 |
| ENSMUSG00000029840 | Mtpn     | 118.4617301 | 124.5372471 | 83.48126575 | 113.9748161 |
| ENSMUSG00000029860 | Zyx      | 108.4857775 | 159.3353193 | 116.0556109 | 166.6654485 |
| ENSMUSG00000029924 | Slc37a3  | 12.54383536 | 11.35525374 | 14.62193304 | 18.86867938 |
| ENSMUSG00000029994 | Anxa4    | 75.76429349 | 69.70425227 | 72.95059977 | 75.01690756 |
| ENSMUSG00000030055 | Rab43    | 14.40421526 | 10.63571006 | 8.975553643 | 10.29813766 |
| ENSMUSG00000030067 | Foxp1    | 14.17233363 | 11.56298882 | 7.339120423 | 7.067188116 |
| ENSMUSG00000030082 | Sec61a1  | 92.91460929 | 93.11769658 | 94.67569685 | 101.2862299 |
| ENSMUSG00000030126 | Tmcc1    | 4.774785864 | 4.990452591 | 3.675609573 | 3.610654065 |
| ENSMUSG00000030172 | Erc1     | 11.79589288 | 9.942063479 | 5.22702988  | 6.288338249 |

|                    |           |             |             |             |             |
|--------------------|-----------|-------------|-------------|-------------|-------------|
| ENSMUSG00000030315 | Vgll4     | 25.80342432 | 22.23878372 | 34.13946281 | 26.87474021 |
| ENSMUSG00000030347 | D6Wsu163e | 10.80710559 | 10.49997078 | 4.847130902 | 5.49405705  |
| ENSMUSG00000030352 | Tspan9    | 34.24734057 | 41.86972037 | 56.1194617  | 56.68913987 |
| ENSMUSG00000030409 | Dmpk      | 69.13823306 | 78.81759293 | 103.8389523 | 107.7782547 |
| ENSMUSG00000030660 | Pik3c2a   | 5.922614525 | 7.251493632 | 3.521601225 | 5.573294048 |
| ENSMUSG00000030685 | Kctd13    | 5.57036463  | 6.221716001 | 13.16731376 | 13.9910761  |
| ENSMUSG00000030754 | Copb1     | 43.5627859  | 44.79534218 | 48.94191961 | 49.46054661 |
| ENSMUSG00000030816 | Rnf40     | 23.97912501 | 21.39428683 | 22.51583765 | 22.01465387 |
| ENSMUSG00000030970 | Ctbp2     | 10.47848527 | 10.49237012 | 6.471240409 | 7.11489282  |
| ENSMUSG00000030980 | Knop1     | 14.74720306 | 15.68657872 | 5.758197212 | 9.206761207 |
| ENSMUSG00000031007 | Atp6ap2   | 50.81432558 | 54.0813882  | 61.73363288 | 84.68552475 |
| ENSMUSG00000031012 | Cask      | 7.2579823   | 6.478943042 | 7.564808609 | 7.328231622 |
| ENSMUSG00000031134 | RbmX      | 16.32139339 | 18.12294148 | 1.887019346 | 2.621027985 |
| ENSMUSG00000031154 | Otud5     | 16.31373649 | 14.87308716 | 19.30439026 | 18.91706285 |
| ENSMUSG00000031284 | Pak3      | 3.478515546 | 3.72322375  | 3.91754916  | 4.669858163 |
| ENSMUSG00000031333 | Abcb7     | 6.470119801 | 6.03672706  | 5.164909447 | 5.228297757 |
| ENSMUSG00000031400 | G6pdx     | 60.26968652 | 48.89195777 | 17.32100669 | 38.2349437  |
| ENSMUSG00000031540 | Kat6a     | 14.17292724 | 12.15467532 | 4.08060018  | 4.775028557 |
| ENSMUSG00000031575 | Ash2l     | 34.08565113 | 34.18836249 | 20.65222494 | 22.36543759 |
| ENSMUSG00000031684 | Slc10a7   | 9.54298782  | 9.152369037 | 3.459440218 | 5.983517878 |
| ENSMUSG00000031691 | Tnpo2     | 46.26256605 | 45.35578238 | 46.63782636 | 47.54159821 |
| ENSMUSG00000031731 | Ap1g1     | 14.15239642 | 12.11164409 | 6.017469199 | 8.433867033 |
| ENSMUSG00000031732 | Phlpp2    | 4.313429768 | 4.723653239 | 1.654289352 | 1.948600414 |
| ENSMUSG00000031751 | Amfr      | 77.48454727 | 71.54679837 | 87.02463659 | 78.61013974 |
| ENSMUSG00000031799 | Tpm4      | 431.5329009 | 539.8311683 | 68.40919291 | 188.4441286 |
| ENSMUSG00000031902 | Nfatc3    | 17.9836748  | 16.15984942 | 9.605821157 | 13.92347014 |
| ENSMUSG00000031924 | Cyb5b     | 76.05176506 | 67.30785266 | 45.34811226 | 56.26329259 |
| ENSMUSG00000031971 | Ccsap     | 3.060557581 | 2.689459787 | 1.508391043 | 2.332723083 |
| ENSMUSG00000032035 | Ets1      | 19.61017321 | 24.11210853 | 8.962658365 | 12.47026691 |
| ENSMUSG00000032096 | Arcn1     | 64.72830291 | 60.28984319 | 56.31311822 | 58.33737213 |
| ENSMUSG00000032112 | Trappc4   | 25.80217777 | 30.42701182 | 22.79118846 | 29.36988205 |
| ENSMUSG00000032217 | Rnf111    | 7.148341182 | 7.384156187 | 4.330428207 | 5.885607012 |
| ENSMUSG00000032220 | Myo1e     | 16.75341696 | 17.16757273 | 9.606634096 | 13.47324649 |
| ENSMUSG00000032231 | Anxa2     | 500.7102313 | 511.3648516 | 241.464888  | 338.0736606 |
| ENSMUSG00000032252 | Glce      | 13.37737737 | 15.90766731 | 13.72497413 | 17.97643574 |
| ENSMUSG00000032253 | Phip      | 5.92874397  | 5.200501664 | 3.04619691  | 3.785443487 |
| ENSMUSG00000032350 | Gclc      | 14.28444905 | 13.36771042 | 4.897495376 | 6.280395022 |
| ENSMUSG00000032383 | Ppib      | 75.331998   | 70.31899901 | 76.5279203  | 92.19927734 |
| ENSMUSG00000032423 | Syncrip   | 29.53600939 | 29.00476864 | 8.634694635 | 9.95452123  |
| ENSMUSG00000032449 | Slc25a36  | 6.691753567 | 6.128872844 | 10.96330408 | 11.48645018 |
| ENSMUSG00000032481 | Smarcc1   | 33.37646084 | 28.24571642 | 18.04448281 | 20.3177637  |
| ENSMUSG00000032512 | Wdr48     | 10.26027908 | 9.207335622 | 6.367047658 | 7.765983653 |
| ENSMUSG00000032560 | Dnajc13   | 19.41489012 | 16.43267847 | 7.473434709 | 9.137290518 |
| ENSMUSG00000032599 | Ip6k2     | 7.778104799 | 8.133183565 | 8.900083001 | 14.64237183 |
| ENSMUSG00000032624 | Eml4      | 10.24332004 | 9.23140183  | 5.261342778 | 5.529172117 |
| ENSMUSG00000032640 | Chsy1     | 10.53807815 | 7.442380919 | 7.875051845 | 8.476342339 |
| ENSMUSG00000032652 | Crebl2    | 3.021090864 | 2.66887908  | 2.001357377 | 3.088573232 |

|                    |               |             |             |             |             |
|--------------------|---------------|-------------|-------------|-------------|-------------|
| ENSMUSG00000032733 | Snx33         | 8.806620636 | 6.488997776 | 6.511142203 | 6.881179766 |
| ENSMUSG00000032757 | Bet1          | 7.696578213 | 8.038570984 | 12.64207995 | 14.31948847 |
| ENSMUSG00000033228 | Scaf11        | 34.90756594 | 32.30750225 | 16.73264385 | 17.06388696 |
| ENSMUSG00000033237 | Arid2         | 10.14776379 | 8.99419747  | 3.443939593 | 5.163186055 |
| ENSMUSG00000033487 | Fndc3a        | 16.85554786 | 14.49374998 | 8.067776187 | 17.8491498  |
| ENSMUSG00000033530 | Ttc7b         | 8.033752367 | 7.902257442 | 13.39952732 | 13.32525823 |
| ENSMUSG00000033629 | Ptplad1       | 18.26891084 | 19.18182486 | 12.75575693 | 17.99524957 |
| ENSMUSG00000033902 | Mapkbp1       | 5.912025214 | 4.982233622 | 7.692701967 | 9.55399922  |
| ENSMUSG00000034101 | Ctnnd1        | 6.832778996 | 6.108859751 | 7.878657475 | 6.392446472 |
| ENSMUSG00000034201 | Gas2l1        | 35.58348849 | 30.94116426 | 30.73911203 | 32.56737645 |
| ENSMUSG00000034254 | Agpat1        | 59.41410616 | 59.6792613  | 51.57290298 | 54.74558238 |
| ENSMUSG00000034341 | Wbp2          | 52.26330806 | 55.10936737 | 74.22376813 | 65.08381747 |
| ENSMUSG00000034342 | Cbl           | 5.293649529 | 4.517496645 | 2.350674681 | 3.528273318 |
| ENSMUSG00000034471 | Caskin2       | 8.327781923 | 7.883932789 | 4.390135174 | 5.15433425  |
| ENSMUSG00000034484 | Snx2          | 35.00948266 | 47.4224485  | 22.09765979 | 36.04408486 |
| ENSMUSG00000034574 | Daam1         | 5.007018167 | 7.000461837 | 5.485369104 | 7.116921303 |
| ENSMUSG00000034575 | Papd7         | 13.55931545 | 11.9367578  | 7.255491607 | 5.562148674 |
| ENSMUSG00000034602 | Mon2          | 16.44026996 | 14.24713659 | 14.70916909 | 17.89697226 |
| ENSMUSG00000034820 | Cpsf7         | 20.80538758 | 21.52568032 | 12.40304474 | 12.42715153 |
| ENSMUSG00000035011 | Zbtb7a        | 29.44187627 | 28.08414475 | 26.92399893 | 26.52784253 |
| ENSMUSG00000035311 | Gnptab        | 12.13446593 | 12.4910308  | 4.808046522 | 6.49130098  |
| ENSMUSG00000035329 | Fbxo33        | 5.199254725 | 5.070612746 | 1.78015161  | 3.313269868 |
| ENSMUSG00000035623 | Rsf1          | 2.982222226 | 2.775481495 | 3.099489086 | 3.451506963 |
| ENSMUSG00000035696 | Rnf38         | 5.506948221 | 6.250803681 | 4.775371634 | 5.653107518 |
| ENSMUSG00000035953 | Tmem55b       | 16.63260146 | 16.60828309 | 17.72728814 | 18.6448132  |
| ENSMUSG00000036155 | Mgat5         | 4.748769299 | 3.73536032  | 2.421505055 | 4.724047832 |
| ENSMUSG00000036197 | Gxylt1        | 15.94144384 | 14.94982945 | 2.336915409 | 3.150632031 |
| ENSMUSG00000036323 | Srp72         | 50.59196191 | 41.49480566 | 51.53164052 | 57.50092994 |
| ENSMUSG00000036438 | Calm2         | 281.9037703 | 279.3432709 | 179.7122015 | 211.3176786 |
| ENSMUSG00000036461 | Elf1          | 7.076810551 | 5.660806323 | 4.51150278  | 4.444617506 |
| ENSMUSG00000036591 | Arhgap21      | 14.83735968 | 12.6247447  | 10.25768686 | 10.68120912 |
| ENSMUSG00000037013 | Ss18          | 13.5911708  | 14.75500625 | 5.867568519 | 7.182629166 |
| ENSMUSG00000037119 | D15Ertd621e   | 49.74563494 | 44.11869244 | 15.17357811 | 22.46125134 |
| ENSMUSG00000037172 | E330009J07Rik | 1.401096437 | 1.888174588 | 1.731941404 | 3.295517489 |
| ENSMUSG00000037235 | Mxd4          | 18.13249134 | 10.69859576 | 47.46530179 | 68.00561444 |
| ENSMUSG00000037236 | Matr3         | 20.22000644 | 20.74051442 | 15.31107821 | 17.44675896 |
| ENSMUSG00000037253 | Mex3c         | 19.53495561 | 24.91929309 | 5.54197524  | 11.22090284 |
| ENSMUSG00000037316 | Bag4          | 3.996491576 | 3.826595986 | 3.068030015 | 3.683462192 |
| ENSMUSG00000037353 | Letmd1        | 16.80750219 | 19.92243628 | 14.60230233 | 23.93161897 |
| ENSMUSG00000037458 | Azin1         | 53.3887323  | 61.9644594  | 34.36194853 | 36.06419076 |
| ENSMUSG00000037475 | Thoc2         | 5.646293997 | 4.931809925 | 3.209126303 | 3.963046655 |
| ENSMUSG00000037487 | Ubr5          | 52.12812671 | 47.82985527 | 43.5834236  | 39.4441829  |
| ENSMUSG00000037503 | Fam168b       | 47.66824684 | 41.71330335 | 16.20020777 | 24.82203017 |
| ENSMUSG00000037722 | Gnpnat1       | 7.940372722 | 8.370479782 | 7.632356511 | 9.838968066 |
| ENSMUSG00000037822 | Smim14        | 11.56324111 | 8.879836168 | 14.16830426 | 14.74650351 |
| ENSMUSG00000037905 | Bri3bp        | 6.540790955 | 5.69630096  | 7.317382841 | 8.045616806 |
| ENSMUSG00000037966 | Ninj1         | 22.91291662 | 22.95972836 | 48.22171762 | 43.24788514 |



|                    |          |             |             |             |             |
|--------------------|----------|-------------|-------------|-------------|-------------|
| ENSMUSG00000038013 | Wipf2    | 6.837007491 | 5.904265373 | 5.389259536 | 6.703128543 |
| ENSMUSG00000038146 | Notch3   | 10.95898707 | 6.323381036 | 20.0404936  | 45.51220235 |
| ENSMUSG00000038291 | Snx25    | 11.13615459 | 11.13598864 | 3.082930449 | 6.979973591 |
| ENSMUSG00000038366 | Lasp1    | 145.8399009 | 208.1811141 | 33.62630864 | 71.56335528 |
| ENSMUSG00000038400 | Pmepa1   | 44.85085483 | 60.45744909 | 11.29530391 | 14.0284159  |
| ENSMUSG00000038402 | Foxf2    | 20.63949274 | 15.75606243 | 14.70338738 | 9.501020458 |
| ENSMUSG00000038518 | Jarid2   | 1.924922266 | 1.360500336 | 2.174793702 | 2.297151157 |
| ENSMUSG00000038534 | Osbpl7   | 1.555652528 | 1.28318271  | 1.320870488 | 1.778822744 |
| ENSMUSG00000038535 | Zfp280d  | 1.430997534 | 1.844134277 | 1.485138806 | 1.444419737 |
| ENSMUSG00000038679 | Trps1    | 3.611771382 | 2.169599032 | 3.739375739 | 3.285008095 |
| ENSMUSG00000038822 | Hace1    | 2.522417903 | 2.262028187 | 1.490244902 | 1.618978025 |
| ENSMUSG00000038872 | Zfhx3    | 4.563340302 | 3.888114678 | 3.397357871 | 3.241870754 |
| ENSMUSG00000039068 | Zzz3     | 8.34030909  | 9.198004318 | 3.963244174 | 4.006099362 |
| ENSMUSG00000039145 | Camk1d   | 2.359449108 | 1.184669823 | 2.135036807 | 1.511506129 |
| ENSMUSG00000039159 | Ube2h    | 30.79688013 | 25.59143421 | 73.60783328 | 84.60428673 |
| ENSMUSG00000039202 | Abhd2    | 22.47236499 | 19.11038171 | 13.79043437 | 21.75511154 |
| ENSMUSG00000039286 | Fndc3b   | 22.68506469 | 24.5934002  | 20.49159626 | 31.54198553 |
| ENSMUSG00000039361 | Picalm   | 41.74873956 | 45.0103096  | 35.05667429 | 37.88258266 |
| ENSMUSG00000039414 | Heatr5b  | 10.23752696 | 8.678097853 | 8.754571267 | 11.68025024 |
| ENSMUSG00000039428 | Tmem135  | 5.28853793  | 6.169693515 | 10.95069589 | 12.86806342 |
| ENSMUSG00000039473 | Ubn1     | 19.85957469 | 20.14963314 | 15.56429078 | 18.9775981  |
| ENSMUSG00000039485 | Tspyl4   | 1.514509413 | 1.238321187 | 1.525725411 | 1.362364047 |
| ENSMUSG00000039585 | Myo9a    | 3.311662132 | 3.340844135 | 1.706345407 | 2.306029627 |
| ENSMUSG00000039630 | Hnrnpu   | 8.248213219 | 8.584682766 | 2.206564639 | 3.008725422 |
| ENSMUSG00000039789 | Zfp597   | 1.780848876 | 2.270245359 | 1.049027875 | 1.569685544 |
| ENSMUSG00000039841 | Zfp800   | 3.197446507 | 4.439946508 | 1.071127164 | 1.482871596 |
| ENSMUSG00000039852 | Rere     | 20.27552036 | 17.93886672 | 24.49871995 | 25.99236141 |
| ENSMUSG00000039910 | Cited2   | 189.8317582 | 228.7606711 | 221.4188219 | 221.3135282 |
| ENSMUSG00000039968 | Rsb1l    | 3.337928227 | 3.023749839 | 4.189548715 | 4.245330115 |
| ENSMUSG00000039988 | Ankrd13c | 32.6912937  | 31.32025068 | 20.06229138 | 24.2953684  |
| ENSMUSG00000040029 | Ipo8     | 17.10399941 | 13.53631131 | 11.2695978  | 9.797950037 |
| ENSMUSG00000040152 | Thbs1    | 388.9384144 | 441.9875683 | 496.6655328 | 476.5278306 |
| ENSMUSG00000040268 | Plekha1  | 9.669069747 | 10.6362612  | 16.92699113 | 17.78331373 |
| ENSMUSG00000040274 | Cdk6     | 9.137292553 | 9.076753977 | 6.260916028 | 7.040195247 |
| ENSMUSG00000040351 | Ankib1   | 16.19398605 | 14.50021917 | 7.397524327 | 11.23680275 |
| ENSMUSG00000040370 | Lym5     | 4.296626763 | 4.353903968 | 9.26327839  | 7.933580668 |
| ENSMUSG00000040479 | Dgkz     | 22.83201445 | 19.73874239 | 18.17580516 | 16.47901439 |
| ENSMUSG00000040520 | Manea    | 8.328992166 | 8.087526037 | 8.440573286 | 11.46798102 |
| ENSMUSG00000040565 | Btaf1    | 9.080679793 | 9.897269149 | 3.781262444 | 4.51848438  |
| ENSMUSG00000040661 | Rad54l2  | 6.59523816  | 6.189343194 | 4.667206155 | 5.945418591 |
| ENSMUSG00000040681 | Hmgn1    | 191.7573359 | 175.2606586 | 45.61479202 | 70.80014123 |
| ENSMUSG00000041040 | Fam117b  | 7.448824639 | 6.547143102 | 6.421332674 | 7.751523175 |
| ENSMUSG00000041075 | Fzd7     | 21.40341716 | 16.06878957 | 20.82898635 | 15.51317944 |
| ENSMUSG00000041220 | Elovl6   | 12.2652008  | 10.68734768 | 4.331707834 | 12.54156693 |
| ENSMUSG00000041258 | Zfp236   | 4.78809527  | 4.891761098 | 3.222188068 | 3.650550057 |
| ENSMUSG00000041324 | Inhba    | 35.97733332 | 50.89064249 | 26.59089632 | 22.13692781 |
| ENSMUSG00000041483 | Zfp281   | 8.788790301 | 8.254735201 | 3.301015863 | 5.473760985 |

|                    |          |             |             |             |             |
|--------------------|----------|-------------|-------------|-------------|-------------|
| ENSMUSG00000041530 | Ago1     | 7.996469188 | 5.336353075 | 5.755889766 | 8.951557184 |
| ENSMUSG00000041695 | Kcnj2    | 20.67784638 | 11.43773229 | 9.145428995 | 8.372558716 |
| ENSMUSG00000041720 | Pi4ka    | 20.71834126 | 18.95976944 | 12.85675056 | 19.88227719 |
| ENSMUSG00000041734 | Kirrel   | 48.79801379 | 39.799364   | 16.53759314 | 18.02871025 |
| ENSMUSG00000041815 | Poldip3  | 60.2802219  | 52.57977773 | 47.55316398 | 43.87711652 |
| ENSMUSG00000041852 | Tcf20    | 13.51024382 | 12.79058254 | 8.771722854 | 9.97536425  |
| ENSMUSG00000041935 | AW549877 | 9.453573206 | 8.272171104 | 10.00744248 | 11.39358827 |
| ENSMUSG00000042138 | Msantd2  | 2.995364668 | 3.3752115   | 1.486293608 | 1.826308901 |
| ENSMUSG00000042271 | Nxt2     | 4.859009135 | 5.805583269 | 2.329824443 | 3.849037503 |
| ENSMUSG00000042292 | Mkl1     | 32.84023586 | 28.54865355 | 26.23753486 | 26.32332776 |
| ENSMUSG00000042460 | C1galt1  | 10.20687616 | 10.84941687 | 5.467570264 | 6.924256265 |
| ENSMUSG00000043061 | Tmem18   | 9.076437112 | 9.999417612 | 2.582873194 | 5.525073251 |
| ENSMUSG00000043190 | Rfesd    | 1.613645584 | 1.49876715  | 2.232594295 | 1.955054854 |
| ENSMUSG00000043415 | Otud1    | 4.482923779 | 6.396076374 | 7.105032174 | 9.038724627 |
| ENSMUSG00000043587 | Pxylp1   | 18.72620531 | 8.180063384 | 8.324008406 | 7.803106001 |
| ENSMUSG00000043929 | Klhl15   | 1.397025848 | 1.326242034 | 1.398864491 | 1.650877488 |
| ENSMUSG00000044098 | Rsb1     | 2.321527607 | 2.450288806 | 2.37673866  | 2.502057256 |
| ENSMUSG00000044149 | Nkrf     | 5.246199218 | 5.662429123 | 1.292606096 | 1.415769938 |
| ENSMUSG00000044786 | Zfp36    | 7.006123039 | 8.428520209 | 8.442253694 | 10.80057479 |
| ENSMUSG00000045038 | Prkce    | 2.237802356 | 2.224685551 | 2.134258075 | 2.817666252 |
| ENSMUSG00000045817 | Zfp36l2  | 90.87645254 | 77.22334369 | 21.69879667 | 30.25548166 |
| ENSMUSG00000046032 | Snx12    | 33.78217013 | 34.08425987 | 20.09591421 | 18.03836733 |
| ENSMUSG00000046434 | Hnrnpa1  | 529.3995209 | 515.1486726 | 184.566014  | 214.3980561 |
| ENSMUSG00000046562 | Unc119b  | 29.34371391 | 24.47898452 | 16.9117807  | 22.02643168 |
| ENSMUSG00000046722 | Cdc42se1 | 35.40004395 | 31.45573598 | 44.98648751 | 54.9995091  |
| ENSMUSG00000047126 | Cltc     | 102.4126383 | 85.17130836 | 75.11262314 | 77.22154489 |
| ENSMUSG00000047407 | Tgif1    | 7.998429989 | 9.992477311 | 12.74257822 | 15.08455378 |
| ENSMUSG00000047712 | Ust      | 5.189014508 | 4.797688039 | 5.135018392 | 10.30220562 |
| ENSMUSG00000047731 | Wbp1l    | 34.16533428 | 24.33923848 | 25.62360388 | 32.34700603 |
| ENSMUSG00000047747 | Rnf150   | 5.092641528 | 2.106122544 | 3.03238272  | 4.164285338 |
| ENSMUSG00000047767 | Atg16l2  | 3.67336061  | 3.501233987 | 6.051717097 | 5.482991583 |
| ENSMUSG00000048482 | Bdnf     | 22.60831308 | 23.04767154 | 6.046986555 | 9.474477238 |
| ENSMUSG00000048833 | Slc39a9  | 13.70804409 | 12.54824694 | 10.32324996 | 13.71280864 |
| ENSMUSG00000049038 | Mterfd3  | 3.041749287 | 3.663665523 | 2.020294328 | 2.495182303 |
| ENSMUSG00000049076 | Acap2    | 15.00116264 | 15.15338165 | 11.83433458 | 13.70012108 |
| ENSMUSG00000049775 | Tmsb4x   | 286.4099905 | 455.3273606 | 266.8193907 | 936.5265593 |
| ENSMUSG00000049807 | Arhgap23 | 20.1207182  | 18.48514756 | 23.51995586 | 19.70174651 |
| ENSMUSG00000050310 | Rictor   | 4.55998455  | 4.197605569 | 3.971734444 | 3.815984977 |
| ENSMUSG00000050390 | C77080   | 19.73874709 | 21.89778949 | 35.23065437 | 45.26879152 |
| ENSMUSG00000050721 | Plekho2  | 17.80994479 | 17.45437078 | 21.90191032 | 23.54504531 |
| ENSMUSG00000050953 | Gja1     | 122.9772672 | 144.0432866 | 76.07347181 | 98.73981019 |
| ENSMUSG00000051853 | Arf3     | 148.126207  | 117.801108  | 108.047577  | 134.8207519 |
| ENSMUSG00000052040 | Klf13    | 13.38389785 | 11.61426631 | 11.68029559 | 11.68163914 |
| ENSMUSG00000052056 | Zfp217   | 5.825104946 | 4.035589789 | 3.293935974 | 3.414711411 |
| ENSMUSG00000052144 | Ppp4r2   | 34.47904952 | 34.17883414 | 21.42568384 | 22.56487128 |
| ENSMUSG00000052459 | Atp6v1a  | 59.54429438 | 47.62701469 | 59.59955607 | 79.05162127 |
| ENSMUSG00000052681 | Rap1b    | 86.78503553 | 87.57226715 | 41.60911542 | 48.95723198 |

|                    |               |             |             |             |             |
|--------------------|---------------|-------------|-------------|-------------|-------------|
| ENSMUSG00000052748 | Swt1          | 1.647643195 | 1.994038616 | 1.461894837 | 1.613374673 |
| ENSMUSG00000052962 | Mrpl35        | 3.329802309 | 3.729669045 | 2.064401654 | 2.305079346 |
| ENSMUSG00000053931 | Cnn3          | 264.3189466 | 258.6699996 | 294.7553778 | 225.5234812 |
| ENSMUSG00000054008 | Ndst1         | 32.76229293 | 33.85666576 | 15.64984455 | 21.85753713 |
| ENSMUSG00000054115 | Skp2          | 7.003451875 | 7.814883982 | 2.163417735 | 2.189679409 |
| ENSMUSG00000054178 | Gm9938        | 2.611660684 | 2.82010841  | 1.976001073 | 2.441766377 |
| ENSMUSG00000054823 | Whsc111       | 11.45430961 | 10.80937768 | 7.559410438 | 9.265111375 |
| ENSMUSG00000054920 | Klh15         | 12.76091289 | 7.98936257  | 23.26359866 | 33.66256936 |
| ENSMUSG00000055065 | Ddx17         | 61.55859328 | 64.34253564 | 37.59769763 | 45.26578137 |
| ENSMUSG00000055435 | Maf           | 7.106390147 | 1.82751907  | 10.50407646 | 5.097967378 |
| ENSMUSG00000055485 | Soga1         | 16.37777884 | 11.66127641 | 9.013068741 | 9.590383438 |
| ENSMUSG00000055633 | Zfp580        | 3.650862404 | 4.682842227 | 4.183741382 | 4.600500379 |
| ENSMUSG00000056220 | Pla2g4a       | 9.748644722 | 12.87634604 | 6.864784821 | 8.466345715 |
| ENSMUSG00000057457 | Phex          | 1.456400111 | 1.181961728 | 5.753751292 | 4.062762957 |
| ENSMUSG00000058706 | 0610030E20Rik | 5.342481661 | 5.497086996 | 5.73276977  | 5.270384064 |
| ENSMUSG00000058881 | Zfp516        | 11.33976133 | 10.82757456 | 15.54040499 | 18.21604527 |
| ENSMUSG00000059005 | Hnrnpa3       | 163.4592678 | 170.0804275 | 51.51012359 | 62.95968842 |
| ENSMUSG00000059474 | Mbtd1         | 3.682145673 | 3.717019504 | 3.659993588 | 3.79299108  |
| ENSMUSG00000059713 | Rcan3         | 7.016380587 | 6.721975882 | 4.859713576 | 6.128612825 |
| ENSMUSG00000059890 | Ube4a         | 10.80802263 | 10.05700122 | 4.30582263  | 6.984831386 |
| ENSMUSG00000060938 | Rpl26         | 86.34282037 | 102.6806683 | 82.38553905 | 79.86359415 |
| ENSMUSG00000061175 | Fnip2         | 10.47858461 | 7.271757832 | 10.42528439 | 8.856879761 |
| ENSMUSG00000061288 | Taok3         | 11.78853035 | 8.920278151 | 11.51869471 | 10.78904042 |
| ENSMUSG00000061559 | Wdr61         | 7.791368384 | 9.152883241 | 6.051888578 | 7.013566706 |
| ENSMUSG00000061665 | Cd2ap         | 12.69940472 | 13.35314555 | 6.042448381 | 8.418140908 |
| ENSMUSG00000061751 | Kalrn         | 4.170807423 | 5.634339277 | 3.106387562 | 5.446433041 |
| ENSMUSG00000062127 | Cttnbp2nl     | 10.29951091 | 9.836141073 | 7.810724323 | 9.520256163 |
| ENSMUSG00000062232 | Rapgef2       | 8.631208557 | 8.373424537 | 5.938559799 | 7.034090988 |
| ENSMUSG00000062352 | Itgb1bp1      | 20.99573036 | 23.98115462 | 15.03821044 | 15.3781566  |
| ENSMUSG00000063902 | Gm7964        | 18.09750629 | 17.38726117 | 9.027075505 | 8.926827263 |
| ENSMUSG00000064068 | Mtx1          | 30.64143895 | 34.17096099 | 25.72495049 | 30.71721667 |
| ENSMUSG00000064080 | Fbln2         | 140.6279481 | 164.9755726 | 109.459244  | 130.6564407 |
| ENSMUSG00000064138 | Fam172a       | 10.16510433 | 8.055498271 | 7.299761066 | 6.769192668 |
| ENSMUSG00000066150 | Slc31a1       | 15.72413081 | 15.8297684  | 18.72046658 | 25.04151811 |
| ENSMUSG00000066406 | Akap13        | 7.512190788 | 5.450919788 | 8.825773332 | 9.792581842 |
| ENSMUSG00000066735 | Vkorc111      | 11.19379254 | 9.498776167 | 6.225759803 | 6.088358895 |
| ENSMUSG00000066798 | Zbtb6         | 5.466484875 | 5.13916464  | 2.062698405 | 2.783647316 |
| ENSMUSG00000066877 | Nck2          | 12.37877434 | 10.00743616 | 17.05621061 | 15.84052115 |
| ENSMUSG00000067194 | Eif1ax        | 44.90201982 | 44.3407089  | 21.89930786 | 20.09599442 |
| ENSMUSG00000067653 | Ankrd23       | 1.22908063  | 1.294126374 | 1.542803161 | 1.93807268  |
| ENSMUSG00000067787 | Blcap         | 27.52810362 | 34.698475   | 16.1622316  | 22.57493162 |
| ENSMUSG00000068015 | Lrch1         | 4.546947314 | 4.172510877 | 3.710237607 | 5.196254456 |
| ENSMUSG00000068739 | Sars          | 90.01778188 | 100.412112  | 139.9789903 | 149.873159  |
| ENSMUSG00000068798 | Rap1a         | 21.51259779 | 24.04071659 | 21.33464145 | 21.15356772 |
| ENSMUSG00000069094 | Pde7a         | 3.291481918 | 3.700659253 | 2.97785932  | 6.502187758 |
| ENSMUSG00000069601 | Ank3          | 2.139422767 | 1.132325809 | 4.856865021 | 3.888375987 |
| ENSMUSG00000069895 | Atxn1l        | 15.62302209 | 13.86546235 | 8.284735298 | 9.67609476  |

|                            |             |             |             |             |
|----------------------------|-------------|-------------|-------------|-------------|
| ENSMUSG00000070327 Rnf213  | 5.282284812 | 4.613322078 | 2.471263849 | 3.294053156 |
| ENSMUSG00000070348 Ccnd1   | 133.6801551 | 129.0533482 | 33.82631047 | 39.45735411 |
| ENSMUSG00000071064 Zfp827  | 4.621272589 | 3.40391146  | 2.293413289 | 2.682580313 |
| ENSMUSG00000071076 Jund    | 27.98495007 | 27.4458341  | 35.16651695 | 43.81865131 |
| ENSMUSG00000071172 Srsf3   | 74.6114497  | 72.70514073 | 7.282413409 | 9.968814549 |
| ENSMUSG00000071451 Psmg4   | 31.37222454 | 30.10344834 | 28.06195592 | 26.7480604  |
| ENSMUSG00000071647 Eml3    | 12.04976271 | 13.00298929 | 7.89597955  | 15.64416065 |
| ENSMUSG00000072872 Rybp    | 3.853597837 | 3.646081426 | 2.532361442 | 3.3033766   |
| ENSMUSG00000073676 Hspe1   | 239.7181443 | 315.3603235 | 154.124154  | 151.9404026 |
| ENSMUSG00000074305 Peak1   | 22.64119555 | 15.60785467 | 13.22180214 | 13.83162617 |
| ENSMUSG00000074513 Arfp1   | 31.94474422 | 31.29875695 | 48.09848708 | 40.31813949 |
| ENSMUSG00000074794 Arrdc3  | 5.122525436 | 3.926072759 | 3.562196342 | 2.899457201 |
| ENSMUSG00000074886 Grk6    | 40.65895429 | 38.44075547 | 6.363856859 | 10.14902858 |
| ENSMUSG00000076432 Ywhaq   | 110.2815655 | 108.7016715 | 62.27797804 | 77.59275273 |
| ENSMUSG00000078789 Dph1    | 4.820505366 | 6.092837388 | 1.757001745 | 2.106675431 |
| ENSMUSG00000079659 Tmem243 | 9.006013985 | 5.848016686 | 8.208882347 | 8.717415187 |
| ENSMUSG00000089715 Cbx6    | 76.38489582 | 56.06767193 | 35.11632223 | 50.95450065 |
| ENSMUSG00000089911 Hiat1   | 16.3498847  | 17.08088159 | 10.31087425 | 11.54787387 |
| ENSMUSG00000091898 Tnnc1   | 3.174930985 | 3.84752927  | 36.55992589 | 46.83462799 |
| ENSMUSG00000094483 Purb    | 21.22891391 | 23.21441665 | 11.40619108 | 16.40542883 |
| ENSMUSG00000098188 Sowahc  | 4.129640511 | 4.836398646 | 3.552208192 | 6.07941942  |

| LFC_KOvsWT_GM | pvalue_KOvsWT_GM | padj_KOvsWT_GM | LFC_KOvsWT_DM | pvalue_KOvsWT_DM |
|---------------|------------------|----------------|---------------|------------------|
| 0.011448      | 0.90405          | 0.96458        | 0.61257       | 0.00012741       |
| -0.36043      | 0.00013131       | 0.0049063      | 0.27519       | 0.085937         |
| 0.29519       | 0.026394         | 0.15764        | 0.24826       | 0.26252          |
| -0.029494     | 0.74755          | 0.89726        | 0.29546       | 0.047568         |
| 0.0019565     | 0.98574          | 0.99466        | 0.44882       | 0.012861         |
| 0.12372       | 0.20753          | 0.4874         | 0.15424       | 0.32967          |
| -0.08754      | 0.59139          | 0.8077         | -0.0057901    | 0.97476          |
| 0.022638      | 0.86577          | 0.94931        | -0.29344      | 0.073587         |
| 0.071198      | 0.49737          | 0.74571        | 0.24632       | 0.14332          |
| -0.1703       | 0.3488           | 0.63002        | -0.01872      | 0.92725          |
| -0.15506      | 0.25431          | 0.53996        | 0.18677       | 0.28018          |
| -0.23805      | 0.016246         | 0.11697        | -0.21029      | 0.29823          |
| 0.6745        | 1.07E-06         | 9.31E-05       | 1.0865        | 2.90E-06         |
| -0.31959      | 0.14638          | 0.40738        | 0.2902        | 0.35938          |
| 0.099837      | 0.46149          | 0.72283        | 0.51775       | 0.014789         |
| 0.012979      | 0.92275          | 0.97213        | 0.30107       | 0.13079          |
| -0.32719      | 0.0077506        | 0.07728        | -0.24854      | 0.24256          |
| -0.046212     | 0.68648          | 0.86214        | 0.97106       | 1.40E-10         |
| -0.059716     | 0.64762          | 0.84087        | 1.6028        | 5.95E-31         |
| -0.074393     | 0.6205           | 0.82443        | 0.28213       | 0.17138          |
| 0.28494       | 0.16232          | 0.42772        | 1.2949        | 2.58E-16         |
| 0.17927       | 0.34081          | 0.62413        | 0.76561       | 0.00109          |
| -0.10225      | 0.48763          | 0.73967        | 0.44184       | 0.0038522        |
| 0.021041      | 0.85263          | 0.94303        | 0.24542       | 0.20813          |
| 0.10753       | 0.26062          | 0.5461         | 0.19795       | 0.24065          |
| -0.13937      | 0.24292          | 0.52906        | 0.16467       | 0.27266          |
| -0.11915      | 0.24984          | 0.53581        | -0.017318     | 0.89803          |
| 0.31886       | 0.042871         | 0.20502        | 0.29887       | 0.045631         |
| 0.3371        | 0.078191         | 0.28757        | 0.76395       | 0.0019784        |
| 0.030551      | 0.77047          | 0.90798        | 0.29291       | 0.10155          |
| -0.065887     | 0.50874          | 0.75391        | -0.22574      | 0.18526          |
| -0.15233      | 0.2206           | 0.50331        | -0.16244      | 0.28337          |
| 0.13562       | 0.33743          | 0.62102        | 0.80447       | 1.30E-11         |
| 0.39116       | 0.0047968        | 0.05691        | -0.12447      | 0.51754          |
| 0.58772       | 0.0024252        | 0.036417       | 0.23188       | 0.42232          |
| 0.23059       | 0.10704          | 0.34183        | 0.53674       | 0.00708          |
| -0.048765     | 0.79695          | 0.91949        | -0.0025666    | 0.98975          |
| -0.13405      | 0.13535          | 0.39104        | 0.15513       | 0.22795          |
| 0.38827       | 0.0060164        | 0.06541        | 0.49267       | 0.0039278        |
| 0.10961       | 0.43971          | 0.705          | 0.36528       | 0.079678         |
| -0.1003       | 0.31243          | 0.59812        | -0.16605      | 0.36532          |
| 0.12913       | 0.13538          | 0.39104        | 0.14067       | 0.40724          |
| -0.37097      | 0.0075417        | 0.075707       | 0.57425       | 0.00022551       |
| -0.040049     | 0.81397          | 0.9275         | -0.051269     | 0.79501          |
| 0.12055       | 0.52873          | 0.76716        | 0.95969       | 1.96E-05         |
| 0.03058       | 0.75384          | 0.89909        | -0.1139       | 0.55324          |

|           |            |            |           |           |
|-----------|------------|------------|-----------|-----------|
| 0.27381   | 0.077497   | 0.28621    | -0.016833 | 0.90392   |
| 0.18429   | 0.06741    | 0.26586    | 0.077065  | 0.57368   |
| 0.54853   | 0.00034427 | 0.0094691  | 0.52924   | 0.014724  |
| 0.40723   | 0.074423   | 0.28116    | 0.52582   | 0.014871  |
| 0.20086   | 0.094939   | 0.32036    | 0.33642   | 0.088848  |
| -0.21488  | 0.13888    | 0.39756    | 0.29921   | 0.19557   |
| -0.11704  | 0.48829    | 0.73992    | 0.060677  | 0.78166   |
| -0.018752 | 0.88628    | 0.95786    | 0.28397   | 0.15364   |
| 0.11281   | 0.5021     | 0.74916    | -0.20102  | 0.347     |
| 0.10072   | 0.3245     | 0.60906    | 0.30514   | 0.052576  |
| -0.14489  | 0.1304     | 0.38204    | -0.046978 | 0.74107   |
| -0.01257  | 0.89172    | 0.96006    | 0.019291  | 0.91058   |
| -0.11924  | 0.32899    | 0.61317    | 0.16426   | 0.25819   |
| 0.076629  | 0.40218    | 0.67569    | 0.21938   | 0.36797   |
| -0.59638  | 1.47E-05   | 0.00088984 | -0.80071  | 7.54E-06  |
| 0.10263   | 0.41379    | 0.68343    | 0.18772   | 0.30173   |
| -0.62426  | 5.17E-07   | 5.03E-05   | 0.020065  | 0.92506   |
| -0.043622 | 0.6795     | 0.8584     | 0.22479   | 0.17828   |
| -0.10081  | 0.52684    | 0.76552    | 0.19838   | 0.30666   |
| -0.20787  | 0.088721   | 0.30701    | 0.29052   | 0.12786   |
| -0.045001 | 0.62276    | 0.82498    | 0.9133    | 3.52E-05  |
| 0.42123   | 0.0092075  | 0.085135   | 0.2718    | 0.12048   |
| -0.32431  | 0.070077   | 0.27208    | 0.62181   | 0.0031547 |
| 0.02484   | 0.78229    | 0.91288    | 0.128     | 0.3113    |
| 0.014886  | 0.9035     | 0.96458    | 0.082515  | 0.68938   |
| 0.038743  | 0.76096    | 0.90183    | 0.71061   | 8.39E-05  |
| -0.053146 | 0.65405    | 0.84402    | 0.34572   | 0.071108  |
| 0.6332    | 0.014008   | 0.10827    | 0.38725   | 0.091629  |
| -0.001282 | 0.99346    | 0.9978     | 0.087863  | 0.58614   |
| 0.06687   | 0.56784    | 0.79263    | 0.58497   | 0.016783  |
| -0.22634  | 0.17068    | 0.43758    | 1.343     | 2.47E-09  |
| 0.08252   | 0.42263    | 0.69072    | -0.012815 | 0.94833   |
| 0.4831    | 0.00094843 | 0.019002   | -0.23709  | 0.25743   |
| -0.15686  | 0.34497    | 0.62704    | 0.20884   | 0.35036   |
| -0.07409  | 0.50639    | 0.7516     | 0.69561   | 2.17E-05  |
| 0.093774  | 0.6362     | 0.8338     | 0.21753   | 0.34716   |
| 0.10853   | 0.44418    | 0.70883    | 0.32419   | 0.095998  |
| 0.23473   | 0.10839    | 0.34436    | 0.2004    | 0.22285   |
| -0.28284  | 0.13172    | 0.38427    | 0.015298  | 0.94354   |
| 0.10539   | 0.25502    | 0.54012    | 0.15517   | 0.43837   |
| 0.069051  | 0.50428    | 0.75068    | 0.018108  | 0.88793   |
| 0.37567   | 0.0012459  | 0.023041   | 0.30294   | 0.19945   |
| -0.41443  | 0.00085918 | 0.017732   | -0.33647  | 0.10434   |
| 0.22641   | 0.045333   | 0.21207    | 0.21985   | 0.25111   |
| 0.012019  | 0.92169    | 0.97202    | -0.016862 | 0.91168   |
| 0.3712    | 0.022629   | 0.14315    | 0.17751   | 0.35359   |
| -0.27737  | 0.22419    | 0.50764    | -0.13389  | 0.55217   |

|           |            |           |           |            |
|-----------|------------|-----------|-----------|------------|
| -0.16616  | 0.053468   | 0.2335    | -0.099708 | 0.60795    |
| -0.014066 | 0.92848    | 0.97398   | 0.49034   | 0.061135   |
| -0.021115 | 0.86383    | 0.94806   | -0.1049   | 0.56276    |
| 0.84768   | 0.00056557 | 0.013534  | 0.35303   | 0.23245    |
| -0.32097  | 0.00059744 | 0.013998  | 0.3322    | 0.075441   |
| 0.066932  | 0.54989    | 0.78078   | 0.024702  | 0.85585    |
| -0.51123  | 9.84E-05   | 0.0038373 | 0.25348   | 0.25437    |
| -0.53908  | 0.00058394 | 0.013793  | 0.21742   | 0.39984    |
| -0.042175 | 0.73339    | 0.89043   | -0.14998  | 0.40442    |
| -0.29657  | 0.10804    | 0.34366   | 0.32598   | 0.15256    |
| -0.45168  | 0.012476   | 0.10123   | -0.088193 | 0.6779     |
| 0.16644   | 0.10288    | 0.33439   | 0.25314   | 0.076201   |
| 0.40017   | 0.03455    | 0.18429   | 0.74172   | 2.13E-06   |
| -0.14769  | 0.45792    | 0.7199    | -0.052492 | 0.78327    |
| -0.016306 | 0.91736    | 0.97016   | 0.090495  | 0.68263    |
| -0.091796 | 0.56565    | 0.79084   | 0.22328   | 0.28226    |
| 0.013161  | 0.91053    | 0.96771   | 0.12271   | 0.51235    |
| 0.46088   | 0.0046131  | 0.055812  | 0.4614    | 0.0019464  |
| -0.056093 | 0.63898    | 0.83501   | -0.23277  | 0.14168    |
| -0.099039 | 0.32564    | 0.61041   | 0.57894   | 0.00034266 |
| -0.17613  | 0.1093     | 0.34575   | -0.16125  | 0.31095    |
| -0.19676  | 0.066396   | 0.26392   | -0.075282 | 0.62785    |
| -0.24527  | 0.016464   | 0.11789   | -0.2048   | 0.36837    |
| -0.14897  | 0.12664    | 0.37591   | -0.046496 | 0.79115    |
| -0.13413  | 0.11708    | 0.35971   | 0.98485   | 2.36E-05   |
| -0.38161  | 0.00053724 | 0.013171  | -0.15097  | 0.57232    |
| 0.22543   | 0.30346    | 0.58873   | 0.6414    | 0.0062207  |
| 0.16388   | 0.2493     | 0.53549   | -0.14392  | 0.38965    |
| 0.53537   | 1.49E-08   | 2.11E-06  | 0.27629   | 0.20499    |
| 0.24988   | 0.045646   | 0.21263   | 0.37353   | 0.059317   |
| -0.41706  | 0.083052   | 0.29638   | 0.48864   | 0.073308   |
| 0.17527   | 0.10853    | 0.34436   | 0.32931   | 0.084494   |
| 0.14839   | 0.34984    | 0.63109   | 0.0051052 | 0.98421    |
| 0.12987   | 0.31069    | 0.59678   | 0.12614   | 0.54709    |
| -0.098916 | 0.38143    | 0.65828   | -0.028486 | 0.87447    |
| 0.43047   | 3.54E-05   | 0.0017326 | 0.065828  | 0.73848    |
| 0.12734   | 0.2601     | 0.54564   | 0.059367  | 0.71362    |
| 0.40476   | 0.038189   | 0.1932    | 0.023361  | 0.91133    |
| 0.19652   | 0.15074    | 0.41304   | 0.24948   | 0.11818    |
| -0.0352   | 0.77684    | 0.91089   | 0.37825   | 0.093248   |
| 0.34777   | 0.022678   | 0.14339   | 0.0091967 | 0.96149    |
| 0.43378   | 0.0054765  | 0.061643  | 0.45126   | 0.012427   |
| 0.35091   | 0.0012795  | 0.023476  | 0.34804   | 0.017714   |
| 0.51405   | 0.0016965  | 0.028711  | 0.26481   | 0.21192    |
| 0.71739   | 0.00033334 | 0.0092747 | 0.014905  | 0.93187    |
| 0.27756   | 0.021896   | 0.14048   | 0.2924    | 0.15976    |
| 0.15678   | 0.21876    | 0.50123   | 0.21599   | 0.13946    |

|            |            |            |           |           |
|------------|------------|------------|-----------|-----------|
| -0.25009   | 0.0017423  | 0.029211   | 0.145     | 0.54783   |
| -0.084899  | 0.42068    | 0.68884    | -0.24304  | 0.1424    |
| -0.12471   | 0.23004    | 0.51558    | 0.083364  | 0.56127   |
| -0.3089    | 0.0021837  | 0.033922   | 0.18235   | 0.24673   |
| -0.27917   | 0.017736   | 0.12301    | 0.17074   | 0.3953    |
| -0.29831   | 0.13249    | 0.38564    | 0.46105   | 0.019659  |
| -0.75223   | 1.28E-06   | 0.00010603 | 0.52933   | 0.0054924 |
| -0.22226   | 0.03716    | 0.19091    | 0.025726  | 0.88129   |
| 0.1085     | 0.55761    | 0.7852     | 0.31734   | 0.11036   |
| 0.15657    | 0.20863    | 0.48839    | 0.41906   | 0.029541  |
| -0.28334   | 0.054506   | 0.23596    | 0.45513   | 0.015753  |
| 0.14317    | 0.11328    | 0.35278    | 0.084123  | 0.61016   |
| 0.035474   | 0.75731    | 0.90039    | 0.71738   | 3.01E-05  |
| 0.0078501  | 0.97097    | 0.98947    | 0.60645   | 0.022078  |
| 0.029557   | 0.79778    | 0.92002    | 0.76531   | 7.45E-05  |
| -0.18777   | 0.090045   | 0.30907    | 0.066474  | 0.65093   |
| -0.022425  | 0.83913    | 0.93697    | 0.40822   | 0.016877  |
| 0.0088818  | 0.94191    | 0.97879    | -0.25044  | 0.2572    |
| -0.04378   | 0.72542    | 0.88539    | 0.23185   | 0.18765   |
| -0.07251   | 0.72298    | 0.88359    | 0.07332   | 0.69788   |
| 0.00062189 | 0.99525    | 0.99823    | 0.34778   | 0.062818  |
| -0.065491  | 0.6112     | 0.81994    | 0.52142   | 0.0033114 |
| -0.24344   | 0.22556    | 0.50937    | -0.16259  | 0.48895   |
| -0.074152  | 0.59163    | 0.80778    | 0.053688  | 0.78561   |
| -0.25221   | 0.21615    | 0.49821    | 0.63161   | 0.0037473 |
| -0.034166  | 0.79525    | 0.91864    | -0.083796 | 0.59312   |
| -0.28937   | 0.0022604  | 0.034703   | -0.025607 | 0.83441   |
| -0.18904   | 0.26174    | 0.54749    | 0.22892   | 0.1723    |
| 0.41697    | 0.0051668  | 0.059555   | 0.18343   | 0.27211   |
| -0.034629  | 0.84093    | 0.93788    | 0.13957   | 0.37481   |
| -0.2998    | 0.10153    | 0.33219    | 0.11297   | 0.65274   |
| 0.053463   | 0.67503    | 0.85561    | 0.096299  | 0.6512    |
| 0.17325    | 0.098006   | 0.32627    | 0.32885   | 0.05004   |
| -0.084419  | 0.49119    | 0.7415     | 0.15278   | 0.33317   |
| 8.78E-05   | 0.99961    | 0.99995    | 0.14964   | 0.50343   |
| 0.11241    | 0.52377    | 0.76334    | -0.12502  | 0.46453   |
| 0.27531    | 0.084255   | 0.2985     | 0.11202   | 0.49331   |
| -0.083975  | 0.62112    | 0.8247     | 0.69544   | 2.86E-06  |
| 0.52112    | 0.0060271  | 0.06541    | 0.22963   | 0.15777   |
| -0.1703    | 0.18348    | 0.45521    | -0.012721 | 0.94707   |
| 0.35776    | 0.014825   | 0.11128    | 0.60908   | 0.01588   |
| -0.085407  | 0.4681     | 0.72618    | -0.055745 | 0.73583   |
| -0.0032418 | 0.98123    | 0.99255    | 0.09214   | 0.66897   |
| -0.11954   | 0.1737     | 0.44163    | 0.072746  | 0.59073   |
| 0.68938    | 0.00021597 | 0.0068033  | 0.84664   | 7.90E-08  |
| -0.20968   | 0.16162    | 0.42687    | 0.087362  | 0.6527    |
| 0.2942     | 0.041659   | 0.2024     | 0.056251  | 0.75343   |



|             |            |           |           |            |
|-------------|------------|-----------|-----------|------------|
| -0.14226    | 0.11827    | 0.36144   | -0.27103  | 0.11181    |
| -0.23052    | 0.089178   | 0.30771   | 0.17895   | 0.28882    |
| 0.13244     | 0.32124    | 0.60643   | 0.055849  | 0.72671    |
| -0.056262   | 0.67306    | 0.8549    | 1.2441    | 4.05E-07   |
| -0.075363   | 0.57386    | 0.7962    | 0.10643   | 0.50698    |
| -0.088387   | 0.42237    | 0.69043   | -0.11827  | 0.36907    |
| 0.31388     | 0.034825   | 0.18495   | -0.22539  | 0.3888     |
| -0.12039    | 0.32263    | 0.60744   | 0.47682   | 0.00025487 |
| 0.12595     | 0.1495     | 0.41141   | 0.56932   | 0.00092989 |
| 0.11687     | 0.3991     | 0.67274   | 0.63857   | 0.0037971  |
| 0.5904      | 0.00038187 | 0.010192  | 0.15936   | 0.38675    |
| -0.047691   | 0.70284    | 0.87164   | -0.099893 | 0.62687    |
| 0.030555    | 0.8532     | 0.94315   | 0.35737   | 0.046739   |
| -0.23096    | 0.045416   | 0.21223   | 0.17501   | 0.46915    |
| -0.15612    | 0.10678    | 0.3414    | 0.10718   | 0.49914    |
| -0.30957    | 0.066155   | 0.26378   | 0.12324   | 0.49599    |
| -0.00025286 | 0.99793    | 0.99932   | 0.17881   | 0.28077    |
| -0.2839     | 0.012302   | 0.10015   | -0.33023  | 0.055993   |
| -0.3691     | 0.044617   | 0.21003   | 0.30071   | 0.082274   |
| -0.28468    | 0.0073375  | 0.074122  | 0.12011   | 0.36468    |
| -0.31418    | 0.001416   | 0.025366  | 0.27098   | 0.16011    |
| 0.0027615   | 0.97196    | 0.99001   | 0.19952   | 0.16648    |
| -0.46268    | 0.013373   | 0.10546   | 0.33172   | 0.055445   |
| -0.37402    | 0.00010269 | 0.0039394 | 0.23377   | 0.11495    |
| 0.37251     | 0.037736   | 0.19195   | 1.0378    | 1.15E-11   |
| -0.060468   | 0.79311    | 0.91736   | 0.64766   | 0.0052961  |
| -0.058379   | 0.53192    | 0.76946   | 0.26984   | 0.11967    |
| 0.37191     | 0.033863   | 0.18268   | 0.24694   | 0.1218     |
| -0.18762    | 0.11048    | 0.34837   | 0.32205   | 0.11015    |
| -0.18921    | 0.1334     | 0.38719   | -0.10986  | 0.56525    |
| -0.24762    | 0.01581    | 0.11551   | -0.20818  | 0.28521    |
| 0.41759     | 0.0025505  | 0.037553  | 0.44914   | 0.029413   |
| -0.44748    | 0.010723   | 0.092383  | 0.29623   | 0.099979   |
| -0.0055431  | 0.96738    | 0.9884    | -0.064654 | 0.66544    |
| -0.10496    | 0.59359    | 0.80898   | 0.29388   | 0.301      |
| -0.18773    | 0.12082    | 0.36658   | 0.054751  | 0.78346    |
| 0.092456    | 0.49438    | 0.74396   | 0.32276   | 0.014593   |
| 0.29622     | 0.0055561  | 0.062344  | 0.17567   | 0.23413    |
| 1.2657      | 2.13E-07   | 2.30E-05  | 0.35625   | 0.11009    |
| 0.11414     | 0.22696    | 0.51108   | 0.1052    | 0.49625    |
| 0.13355     | 0.49103    | 0.7415    | 0.44626   | 0.0037584  |
| -0.25347    | 0.23223    | 0.51788   | -0.81854  | 0.00039852 |
| -0.12896    | 0.27939    | 0.56567   | 0.58962   | 0.011748   |
| 0.40171     | 0.0094209  | 0.085802  | 0.06985   | 0.69816    |
| 0.060834    | 0.65665    | 0.8455    | 0.26444   | 0.16178    |
| -0.027751   | 0.82967    | 0.93278   | 0.206     | 0.3984     |
| 0.13062     | 0.40372    | 0.67672   | 0.20794   | 0.28635    |

|           |           |           |            |            |
|-----------|-----------|-----------|------------|------------|
| 0.23603   | 0.0095015 | 0.086119  | -0.0042821 | 0.97683    |
| 0.12819   | 0.33641   | 0.62003   | 0.59901    | 0.00032259 |
| 0.26852   | 0.014414  | 0.10988   | 0.39467    | 0.018413   |
| 0.24735   | 0.061998  | 0.25473   | 0.23257    | 0.2438     |
| 0.3791    | 0.0093843 | 0.085601  | 0.12952    | 0.37562    |
| 0.344     | 0.047504  | 0.21742   | 0.93725    | 5.78E-06   |
| -0.13953  | 0.39661   | 0.67089   | -0.047905  | 0.74556    |
| -0.082658 | 0.6386    | 0.83496   | -0.070973  | 0.73262    |
| -0.17313  | 0.25416   | 0.53996   | -0.52015   | 0.035664   |
| 0.30941   | 0.11697   | 0.35968   | 0.48298    | 0.021356   |
| -0.20344  | 0.17629   | 0.44497   | 0.4765     | 0.00048152 |
| 0.3641    | 0.017094  | 0.12012   | 0.69768    | 0.00010705 |
| -0.20578  | 0.24829   | 0.53467   | 0.038149   | 0.76057    |
| 0.26597   | 0.075359  | 0.2825    | 0.22057    | 0.36012    |
| 0.27393   | 0.084188  | 0.29843   | 0.38668    | 0.088859   |
| -0.10678  | 0.49283   | 0.7428    | 0.3213     | 0.026406   |
| -0.2685   | 0.13197   | 0.38452   | 0.31868    | 0.15311    |
| -0.31741  | 0.12085   | 0.3666    | -0.09264   | 0.62819    |
| -0.58236  | 4.03E-07  | 4.12E-05  | -0.13508   | 0.42872    |
| -0.21502  | 0.16836   | 0.43446   | 0.4603     | 0.049832   |
| 0.20078   | 0.079422  | 0.28975   | 0.46616    | 0.004777   |
| -0.13446  | 0.3463    | 0.6281    | 0.73833    | 4.37E-05   |
| 0.40572   | 0.0035369 | 0.046592  | 0.3135     | 0.060524   |
| 0.15671   | 0.14625   | 0.40737   | 0.40776    | 0.051256   |
| -0.29958  | 0.030708  | 0.17265   | -0.24544   | 0.17639    |
| -0.14742  | 0.35624   | 0.63511   | -0.17967   | 0.3077     |
| -0.07015  | 0.64482   | 0.83927   | -0.028495  | 0.91027    |
| 0.0061934 | 0.96557   | 0.9879    | 0.69617    | 0.00022411 |
| -0.4934   | 0.014037  | 0.10839   | -0.23249   | 0.2445     |
| 0.0054658 | 0.9687    | 0.98909   | -0.090908  | 0.67877    |
| -0.18905  | 0.090236  | 0.30958   | 0.15679    | 0.40776    |
| -0.36227  | 0.0043883 | 0.054092  | -0.1917    | 0.27954    |
| -0.39798  | 0.0097757 | 0.087462  | 0.1507     | 0.31495    |
| 0.018719  | 0.88928   | 0.95883   | 0.80769    | 2.12E-06   |
| 0.12807   | 0.39713   | 0.67128   | 0.33137    | 0.14443    |
| -0.013829 | 0.8941    | 0.96127   | -5.36E-05  | 0.99972    |
| 0.32458   | 8.94E-05  | 0.0035611 | 0.02621    | 0.85855    |
| -0.14953  | 0.29832   | 0.5843    | 0.43934    | 0.032253   |
| 0.08821   | 0.34216   | 0.62512   | 0.38031    | 0.023404   |
| 0.51158   | 0.0020753 | 0.032712  | 0.46831    | 0.006775   |
| -0.12083  | 0.20809   | 0.48773   | 0.32241    | 0.032157   |
| -0.096178 | 0.4536    | 0.71673   | 0.021757   | 0.8954     |
| -0.38468  | 0.0099626 | 0.088485  | 0.15784    | 0.34733    |
| -0.25908  | 0.048173  | 0.2195    | -0.077481  | 0.74025    |
| 0.021895  | 0.81166   | 0.92613   | 0.076863   | 0.6971     |
| 0.078252  | 0.55133   | 0.78106   | -0.060961  | 0.76356    |
| -0.21534  | 0.055923  | 0.23999   | 0.19805    | 0.33317    |

|            |            |           |           |            |
|------------|------------|-----------|-----------|------------|
| -0.17677   | 0.25452    | 0.53996   | -0.32525  | 0.091762   |
| -0.024462  | 0.83439    | 0.93432   | 0.13513   | 0.44323    |
| 0.26165    | 0.18678    | 0.45953   | -0.011922 | 0.95285    |
| 0.19502    | 0.12045    | 0.366     | 0.022692  | 0.87865    |
| 0.26856    | 0.11862    | 0.36207   | 0.54633   | 0.0066702  |
| 0.16454    | 0.28897    | 0.5755    | 0.071311  | 0.72825    |
| 0.05703    | 0.48731    | 0.7396    | -0.022333 | 0.88385    |
| -0.14175   | 0.12294    | 0.37043   | -0.051486 | 0.72779    |
| 0.017032   | 0.88499    | 0.95683   | 0.094137  | 0.54182    |
| 0.10371    | 0.40352    | 0.67672   | 0.56907   | 0.004271   |
| 0.09941    | 0.41553    | 0.68429   | 0.40127   | 0.016234   |
| -0.12428   | 0.46201    | 0.72334   | -0.075691 | 0.68052    |
| 0.1445     | 0.40787    | 0.6794    | 0.34235   | 0.16209    |
| -0.11125   | 0.27063    | 0.55647   | -0.045152 | 0.76122    |
| 0.10488    | 0.51292    | 0.75721   | 0.19585   | 0.27156    |
| -0.077729  | 0.55519    | 0.78362   | -0.024146 | 0.89772    |
| -0.25502   | 0.13306    | 0.38673   | 1.0116    | 3.12E-08   |
| -0.19341   | 0.11654    | 0.35891   | 0.13512   | 0.59128    |
| 0.019099   | 0.85917    | 0.94619   | 0.087216  | 0.59703    |
| -0.038046  | 0.73703    | 0.89167   | 0.65057   | 0.0027399  |
| -0.0098756 | 0.92474    | 0.97267   | 0.013165  | 0.94628    |
| -0.20084   | 0.039942   | 0.19833   | 0.37563   | 0.07978    |
| 0.14396    | 0.19736    | 0.47404   | 0.17848   | 0.35941    |
| -0.090735  | 0.44072    | 0.70562   | -0.15934  | 0.367      |
| 0.30826    | 0.061811   | 0.25441   | 1.337     | 1.18E-16   |
| -0.1296    | 0.30736    | 0.59303   | 0.41801   | 0.06661    |
| -0.14942   | 0.29184    | 0.57794   | 0.22196   | 0.31563    |
| -0.14647   | 0.41828    | 0.68616   | 0.55268   | 0.0019201  |
| 0.29187    | 0.050176   | 0.22465   | 0.42245   | 0.015194   |
| -0.082065  | 0.36182    | 0.64007   | 0.015664  | 0.92358    |
| 0.2419     | 0.043658   | 0.20713   | 0.32546   | 0.03511    |
| 0.060894   | 0.53131    | 0.76906   | 0.34928   | 0.10084    |
| 0.05031    | 0.70441    | 0.87263   | 0.44131   | 0.0043824  |
| 0.047818   | 0.64886    | 0.84145   | 0.43382   | 0.013583   |
| 0.2559     | 0.030824   | 0.17293   | 0.30926   | 0.14366    |
| -0.15628   | 0.28426    | 0.57057   | 0.24413   | 0.23008    |
| -0.072726  | 0.62776    | 0.8285    | 0.30269   | 0.070313   |
| -0.076902  | 0.46306    | 0.72398   | 0.23071   | 0.26787    |
| -0.0081223 | 0.93426    | 0.97627   | 0.15814   | 0.34057    |
| -0.09994   | 0.48042    | 0.73535   | 0.035411  | 0.85555    |
| -0.21626   | 0.011411   | 0.095717  | 0.12907   | 0.3695     |
| -0.13319   | 0.22034    | 0.50296   | 0.22202   | 0.24305    |
| -0.20708   | 0.15895    | 0.42299   | 0.20705   | 0.34254    |
| 0.075386   | 0.58143    | 0.80095   | 0.63669   | 0.00012721 |
| -0.12812   | 0.21898    | 0.50143   | 0.031986  | 0.84986    |
| -0.45658   | 0.00014682 | 0.0052109 | 0.074232  | 0.6283     |
| -0.13611   | 0.43173    | 0.69897   | 0.50878   | 0.021765   |

|            |            |          |           |            |
|------------|------------|----------|-----------|------------|
| -0.39155   | 0.003415   | 0.045825 | 0.035277  | 0.83303    |
| 0.074646   | 0.53148    | 0.76923  | 0.14772   | 0.32902    |
| -0.091173  | 0.3288     | 0.61317  | -0.014493 | 0.93678    |
| -0.14723   | 0.29278    | 0.57883  | 0.40886   | 0.12253    |
| -0.18069   | 0.26773    | 0.55351  | 0.9273    | 5.44E-05   |
| -0.0041966 | 0.97603    | 0.99095  | -0.037672 | 0.82599    |
| 0.084666   | 0.46764    | 0.72599  | 0.42849   | 0.012671   |
| -0.21239   | 0.09631    | 0.32294  | 0.25693   | 0.14603    |
| -0.13764   | 0.20368    | 0.48281  | -0.28713  | 0.20433    |
| -0.17612   | 0.1224     | 0.36936  | 0.048812  | 0.7327     |
| 0.024275   | 0.79651    | 0.9192   | 0.052561  | 0.68382    |
| 0.088255   | 0.40764    | 0.6794   | -0.18971  | 0.26449    |
| -0.20023   | 0.067839   | 0.26707  | 0.46045   | 0.039008   |
| -0.056162  | 0.62323    | 0.82501  | 0.19072   | 0.19107    |
| 0.41671    | 0.00342    | 0.04585  | 0.62811   | 0.00011561 |
| 0.44182    | 0.0093657  | 0.085601 | 0.32024   | 0.060038   |
| -0.16224   | 0.054296   | 0.23533  | -0.37037  | 0.055936   |
| -0.18159   | 0.078169   | 0.28757  | 0.23885   | 0.13309    |
| 0.063147   | 0.64606    | 0.83968  | -0.023025 | 0.88512    |
| -0.047931  | 0.54769    | 0.77951  | -0.049274 | 0.75303    |
| 0.058362   | 0.52157    | 0.76189  | 0.34586   | 0.079186   |
| -0.018092  | 0.86804    | 0.95061  | 0.75756   | 0.00028799 |
| -0.082302  | 0.45719    | 0.71951  | 0.094009  | 0.65445    |
| 0.18659    | 0.17529    | 0.44341  | 0.18699   | 0.27347    |
| 0.015131   | 0.88306    | 0.9562   | 0.03373   | 0.81402    |
| -0.27489   | 0.14113    | 0.40118  | 0.80384   | 0.00017999 |
| -0.067063  | 0.62282    | 0.82498  | 0.31564   | 0.18184    |
| -0.24834   | 0.070303   | 0.27244  | 0.11798   | 0.49595    |
| 0.00065513 | 0.99606    | 0.99863  | 0.20114   | 0.21788    |
| -0.21359   | 0.3578     | 0.63599  | -0.051848 | 0.82289    |
| -0.20313   | 0.12248    | 0.36937  | 0.0035832 | 0.98807    |
| 0.12755    | 0.28279    | 0.56899  | 0.23255   | 0.17633    |
| -0.14931   | 0.18985    | 0.46402  | 0.46432   | 0.017367   |
| 0.39224    | 0.023157   | 0.14527  | 0.81177   | 4.53E-06   |
| -0.64021   | 0.00037889 | 0.010187 | 0.46398   | 0.0035067  |
| 0.053366   | 0.56362    | 0.78952  | 0.15542   | 0.2621     |
| 0.34718    | 0.0031359  | 0.043292 | 0.76924   | 0.0026311  |
| -0.038928  | 0.77937    | 0.91181  | 0.19917   | 0.34175    |
| 0.24219    | 0.082981   | 0.29627  | 0.62282   | 0.0020302  |
| 0.21937    | 0.066326   | 0.26392  | 0.03419   | 0.78315    |
| -0.16432   | 0.24453    | 0.53031  | 0.22059   | 0.33672    |
| -0.097438  | 0.41508    | 0.68403  | -0.16633  | 0.36667    |
| -0.1689    | 0.04859    | 0.22042  | 0.53596   | 0.00097531 |
| 0.088244   | 0.47137    | 0.72863  | 0.28323   | 0.2144     |
| -0.32191   | 0.053382   | 0.23333  | 0.041124  | 0.82392    |
| -0.16849   | 0.22499    | 0.50848  | 0.10796   | 0.5054     |
| 0.018558   | 0.88275    | 0.95613  | -0.15343  | 0.41229    |

|           |            |          |           |            |
|-----------|------------|----------|-----------|------------|
| -0.18849  | 0.0345     | 0.18422  | 0.26692   | 0.084714   |
| -0.5708   | 0.014126   | 0.10854  | 1.1033    | 8.51E-16   |
| 0.015915  | 0.8818     | 0.95611  | 1.0411    | 2.23E-08   |
| 0.48373   | 0.00135    | 0.024489 | 0.99043   | 5.09E-09   |
| 0.39958   | 0.018788   | 0.12743  | 0.23774   | 0.28819    |
| -0.3292   | 0.057578   | 0.24404  | -0.60004  | 0.0015962  |
| -0.4185   | 0.021182   | 0.13787  | 0.04008   | 0.80062    |
| -0.22811  | 0.17906    | 0.44905  | 0.35481   | 0.098349   |
| 0.3403    | 0.037399   | 0.1915   | -0.07467  | 0.6777     |
| -0.5656   | 0.0082824  | 0.08027  | -0.18738  | 0.45628    |
| -0.13006  | 0.3046     | 0.58989  | 0.062562  | 0.75185    |
| -0.1984   | 0.11246    | 0.35148  | -0.08825  | 0.62698    |
| 0.15053   | 0.23383    | 0.51963  | -0.028109 | 0.89057    |
| -0.85262  | 1.09E-06   | 9.39E-05 | -0.47714  | 0.013508   |
| -0.2315   | 0.098161   | 0.32664  | 0.16028   | 0.29948    |
| -0.20749  | 0.037158   | 0.19091  | 0.5776    | 0.00038778 |
| 0.12677   | 0.33826    | 0.62164  | 0.52023   | 0.0068996  |
| 0.11912   | 0.37606    | 0.6535   | 0.073037  | 0.62853    |
| -0.21363  | 0.026844   | 0.15907  | 0.33759   | 0.068816   |
| 0.22303   | 0.082543   | 0.29571  | 0.19657   | 0.11905    |
| 0.038593  | 0.70101    | 0.87064  | 0.23834   | 0.12829    |
| -0.16454  | 0.52444    | 0.76338  | -0.18321  | 0.45034    |
| 0.026464  | 0.87511    | 0.95287  | 0.3002    | 0.23679    |
| 0.06955   | 0.55049    | 0.7808   | 0.31888   | 0.22962    |
| 0.31065   | 0.11147    | 0.35     | 0.44492   | 0.060108   |
| 0.45543   | 0.00060772 | 0.014123 | 0.38364   | 0.054392   |
| -0.15177  | 0.23414    | 0.51988  | 0.056956  | 0.67038    |
| 0.26748   | 0.036997   | 0.19061  | -0.021583 | 0.91524    |
| -0.1184   | 0.37415    | 0.65196  | -0.017553 | 0.92462    |
| -0.043171 | 0.68422    | 0.86043  | 0.21951   | 0.20155    |
| -0.30959  | 0.0013674  | 0.024681 | -0.22414  | 0.171      |
| 0.19124   | 0.131      | 0.38324  | -0.079588 | 0.75082    |
| 0.14686   | 0.20663    | 0.48664  | 0.03683   | 0.86104    |
| 0.010081  | 0.9437     | 0.97944  | 0.12649   | 0.42642    |
| -0.13574  | 0.21546    | 0.49752  | 0.51158   | 0.0065421  |
| 0.032719  | 0.83442    | 0.93432  | -0.23503  | 0.13033    |
| -0.18423  | 0.097433   | 0.32512  | -0.14623  | 0.3944     |
| -0.020993 | 0.88743    | 0.95805  | 0.34865   | 0.08468    |
| 0.13104   | 0.35722    | 0.63576  | 0.17406   | 0.44021    |
| -0.071152 | 0.51411    | 0.75805  | 0.27436   | 0.1766     |
| -0.10786  | 0.28811    | 0.57442  | 0.58399   | 1.24E-05   |
| -0.15811  | 0.22922    | 0.51441  | 0.23379   | 0.12542    |
| -0.3314   | 0.081163   | 0.29285  | -0.40903  | 0.036138   |
| -0.14492  | 0.51401    | 0.75798  | 1.015     | 0.00050254 |
| 0.047721  | 0.62087    | 0.82464  | 0.11961   | 0.56645    |
| 0.41868   | 0.048219   | 0.21954  | -0.2643   | 0.21853    |
| -0.066613 | 0.63123    | 0.83137  | 0.51854   | 0.055603   |

|            |            |          |            |            |
|------------|------------|----------|------------|------------|
| -0.52783   | 6.71E-05   | 0.002855 | 0.56161    | 0.0008658  |
| -0.3084    | 0.22108    | 0.50388  | -0.098908  | 0.75581    |
| -0.10376   | 0.50344    | 0.75023  | 0.57166    | 7.24E-06   |
| -0.26341   | 0.016612   | 0.1182   | 0.086285   | 0.53547    |
| -0.17439   | 0.035119   | 0.18566  | -0.13212   | 0.30708    |
| -0.058986  | 0.50425    | 0.75068  | 0.12822    | 0.47932    |
| -0.15685   | 0.3026     | 0.58827  | 0.12178    | 0.57454    |
| 0.16986    | 0.25027    | 0.53592  | 0.24313    | 0.25878    |
| 0.22837    | 0.22246    | 0.50581  | 0.52526    | 0.042978   |
| -0.17157   | 0.16132    | 0.42666  | -0.014546  | 0.93355    |
| 0.095086   | 0.50037    | 0.74744  | 0.24533    | 0.27479    |
| 0.14149    | 0.42972    | 0.69746  | 0.95952    | 1.63E-07   |
| -0.07262   | 0.73201    | 0.88961  | -0.19755   | 0.39448    |
| 0.46028    | 0.0099491  | 0.088485 | 0.28324    | 0.24834    |
| -0.65677   | 0.011381   | 0.095669 | -0.10521   | 0.70012    |
| -0.04914   | 0.75871    | 0.90132  | 0.1658     | 0.49313    |
| 0.085771   | 0.54575    | 0.77837  | 0.026513   | 0.89691    |
| 0.11913    | 0.32155    | 0.6067   | 0.06374    | 0.80219    |
| 0.24679    | 0.16816    | 0.43446  | 0.29961    | 0.22786    |
| 0.012222   | 0.94304    | 0.97918  | 0.3496     | 0.018071   |
| -0.21281   | 0.0055839  | 0.062528 | 0.40016    | 0.079569   |
| 0.029941   | 0.74436    | 0.89604  | -0.16786   | 0.29912    |
| -0.021488  | 0.87456    | 0.95267  | 0.18141    | 0.32437    |
| -0.2262    | 0.10435    | 0.3367   | 0.32878    | 0.057682   |
| -0.14692   | 0.18765    | 0.46072  | 0.25749    | 0.16554    |
| -0.23355   | 0.074173   | 0.28071  | -0.0056182 | 0.97754    |
| 0.31268    | 0.022388   | 0.142    | 0.21033    | 0.34637    |
| -0.086698  | 0.52875    | 0.76716  | 0.91819    | 1.16E-09   |
| -0.45688   | 1.03E-06   | 9.02E-05 | 0.2817     | 0.098705   |
| -1.0412    | 1.21E-07   | 1.37E-05 | 0.34639    | 0.13334    |
| -0.04682   | 0.7892     | 0.91536  | -0.12889   | 0.58367    |
| 0.045331   | 0.78567    | 0.91435  | 0.57432    | 0.00044489 |
| -0.10149   | 0.38307    | 0.65949  | 0.33727    | 0.058731   |
| 0.24698    | 0.15244    | 0.41483  | 0.24324    | 0.21993    |
| 0.028692   | 0.81126    | 0.92611  | 0.15222    | 0.42729    |
| 0.57894    | 0.00302    | 0.042342 | 1.5573     | 1.16E-12   |
| -0.088714  | 0.57966    | 0.79984  | -0.24696   | 0.20612    |
| -0.093511  | 0.51685    | 0.75897  | -0.085489  | 0.6926     |
| 0.15159    | 0.30785    | 0.59375  | 0.31594    | 0.11981    |
| -0.0082032 | 0.94833    | 0.98154  | 0.087684   | 0.7057     |
| 0.23845    | 0.013309   | 0.10525  | 0.29371    | 0.18995    |
| -0.29342   | 0.014844   | 0.11133  | 0.2836     | 0.030471   |
| -0.15298   | 0.40897    | 0.68001  | -0.034827  | 0.83265    |
| -0.47479   | 0.00034049 | 0.009383 | 0.0092512  | 0.96577    |
| 0.0052271  | 0.96614    | 0.98793  | 0.029009   | 0.87228    |
| -0.28282   | 0.04757    | 0.21765  | 0.35132    | 0.022129   |
| 0.031464   | 0.75254    | 0.89909  | 0.196      | 0.11358    |

|           |           |          |            |            |
|-----------|-----------|----------|------------|------------|
| 0.26769   | 0.066553  | 0.26436  | 0.093994   | 0.62943    |
| 0.16602   | 0.21815   | 0.50077  | 0.12032    | 0.5377     |
| -0.011925 | 0.90631   | 0.9655   | -0.38967   | 0.030682   |
| 0.063166  | 0.60435   | 0.81561  | 0.4277     | 0.0039024  |
| 0.16798   | 0.15173   | 0.41423  | -0.018176  | 0.91979    |
| 0.09744   | 0.65726   | 0.84561  | 0.1888     | 0.50109    |
| -0.064606 | 0.46457   | 0.72428  | 0.2385     | 0.12833    |
| -0.56757  | 0.0014512 | 0.025773 | 0.45305    | 0.026432   |
| 0.079997  | 0.47317   | 0.72926  | 0.18433    | 0.44733    |
| -1.4932   | 1.26E-11  | 2.88E-09 | -0.87612   | 0.00057226 |
| -0.43355  | 0.0030513 | 0.042615 | 0.053055   | 0.76224    |
| 0.32337   | 0.071228  | 0.27454  | 0.11878    | 0.6465     |
| 0.38783   | 0.0064427 | 0.067649 | 0.24251    | 0.17       |
| -0.213    | 0.35444   | 0.63385  | -0.422     | 0.10482    |
| 0.054572  | 0.63751   | 0.83442  | -0.13868   | 0.37247    |
| -0.046705 | 0.66645   | 0.85073  | 0.18659    | 0.2016     |
| 0.065444  | 0.64864   | 0.84136  | 0.24002    | 0.11452    |
| 0.031083  | 0.85089   | 0.94241  | 0.015663   | 0.92335    |
| -0.038382 | 0.77362   | 0.90954  | 0.29511    | 0.040079   |
| -0.081088 | 0.44529   | 0.70968  | 0.51708    | 0.039129   |
| 0.18622   | 0.44187   | 0.70649  | -0.0068139 | 0.98292    |
| -0.47775  | 9.90E-05  | 0.003849 | -0.19851   | 0.45548    |
| -0.34986  | 0.01823   | 0.12549  | -0.11653   | 0.48328    |
| 0.23461   | 0.068026  | 0.26766  | 0.18014    | 0.24854    |
| 0.086058  | 0.50497   | 0.75072  | 0.36381    | 0.10405    |
| 0.34127   | 0.13684   | 0.39364  | 0.64851    | 0.004347   |
| -0.044368 | 0.72819   | 0.88748  | 0.24436    | 0.074004   |
| -0.021979 | 0.87471   | 0.95267  | 0.1785     | 0.37604    |
| 0.20029   | 0.056069  | 0.24033  | 0.020487   | 0.91872    |
| -0.039291 | 0.78178   | 0.91288  | -0.042894  | 0.77021    |
| 0.16777   | 0.11814   | 0.36144  | 0.22203    | 0.19523    |
| 0.22403   | 0.18418   | 0.45617  | 0.21954    | 0.2338     |
| -0.28339  | 0.064579  | 0.26007  | -0.13539   | 0.46687    |
| 0.025608  | 0.78219   | 0.91288  | 0.37178    | 0.026433   |
| -0.41552  | 0.0011086 | 0.021264 | 0.10579    | 0.48479    |
| -0.19933  | 0.1641    | 0.42946  | -0.064703  | 0.76662    |
| -0.067704 | 0.60028   | 0.81331  | 0.29807    | 0.24836    |
| -0.26549  | 0.060574  | 0.2514   | -0.11762   | 0.55397    |
| 0.0006153 | 0.994     | 0.99783  | -0.14733   | 0.22251    |
| 0.077764  | 0.70831   | 0.87489  | 0.25034    | 0.31921    |
| 0.31716   | 0.055136  | 0.23761  | 0.43412    | 0.00093664 |
| -0.10078  | 0.39046   | 0.66615  | 0.36617    | 0.12265    |
| 0.16578   | 0.14742   | 0.409    | 0.081034   | 0.72483    |
| 0.16799   | 0.14065   | 0.40042  | -0.031949  | 0.82644    |
| 0.16935   | 0.24568   | 0.53193  | 0.98809    | 5.00E-08   |
| -0.44153  | 0.091116  | 0.31185  | -0.30736   | 0.1656     |
| -0.14937  | 0.084611  | 0.2992   | 0.17523    | 0.28171    |

|            |            |          |           |            |
|------------|------------|----------|-----------|------------|
| -0.13821   | 0.49224    | 0.74246  | 0.29699   | 0.20905    |
| -0.022924  | 0.9015     | 0.96367  | 0.1723    | 0.47334    |
| -0.39073   | 0.0052359  | 0.059872 | 0.16679   | 0.4094     |
| -0.013554  | 0.93418    | 0.97627  | 0.2698    | 0.14422    |
| -0.019925  | 0.80043    | 0.92121  | 0.37899   | 0.030189   |
| -0.038905  | 0.76761    | 0.90615  | -0.061274 | 0.79531    |
| 0.12384    | 0.27017    | 0.55595  | 0.89931   | 1.30E-07   |
| -0.059298  | 0.69671    | 0.86809  | 0.30642   | 0.10507    |
| 0.38721    | 0.0039625  | 0.050532 | -0.039583 | 0.81898    |
| -0.44947   | 0.0095344  | 0.086168 | 0.023244  | 0.89577    |
| -0.0094466 | 0.92809    | 0.97393  | -0.25278  | 0.10833    |
| -0.32741   | 0.037244   | 0.19114  | -0.25421  | 0.35586    |
| -0.056349  | 0.63673    | 0.83403  | 0.61423   | 3.20E-05   |
| -0.0042418 | 0.96667    | 0.98807  | 0.27789   | 0.025545   |
| 0.31026    | 0.086544   | 0.30291  | 0.21136   | 0.32358    |
| -0.54642   | 0.00024635 | 0.00754  | 0.042051  | 0.8311     |
| -0.39623   | 0.0048873  | 0.057416 | 0.47733   | 0.0010649  |
| 0.077684   | 0.44566    | 0.71002  | 0.11536   | 0.47292    |
| 0.21485    | 0.34942    | 0.63072  | 0.17863   | 0.57189    |
| 0.13727    | 0.25714    | 0.54194  | 0.43027   | 0.025389   |
| 0.22633    | 0.10658    | 0.34108  | 0.67768   | 0.00092299 |



padj\_KOvsWT\_DM

0.0057255

0.47224

0.69899

0.35486

0.16704

0.7556

0.99675

0.44339

0.57164

0.98628

0.71457

0.73239

0.00025522

0.7772

0.18117

0.55386

0.68479

3.25E-08

8.30E-28

0.61488

1.27E-13

0.029331

0.075459

0.65516

0.68285

0.70648

0.98149

0.34815

0.047266

0.50344

0.63156

0.71708

3.44E-09

0.86132

0.81733

0.11479

0.99854

0.67198

0.076356

0.45892

0.78116

0.80785

0.0088689

0.95456

0.0012875

0.87614

0.98213  
0.8807  
0.18082  
0.18189  
0.47869  
0.64219  
0.95275  
0.58985  
0.76876  
0.3741  
0.94128  
0.98356  
0.69515  
0.78311  
0.00056127  
0.73414  
0.98596  
0.6233  
0.7385  
0.54785  
0.0020483  
0.53703  
0.066284  
0.7413  
0.92656  
0.004164  
0.43556  
0.48522  
0.88767  
0.19755  
4.67E-07  
0.99105  
0.69468  
0.77089  
0.0013986  
0.76881  
0.49278  
0.66691  
0.98988  
0.82342  
0.97914  
0.6473  
0.50917  
0.69073  
0.98356  
0.77333  
0.87596

0.89774  
0.40416  
0.87772  
0.67508  
0.44908  
0.97166  
0.69321  
0.80292  
0.80586  
0.58773  
0.92194  
0.45144  
0.00019603  
0.95275  
0.92379  
0.71595  
0.85985  
0.046648  
0.57005  
0.012082  
0.74091  
0.907  
0.78352  
0.95434  
0.0014976  
0.87992  
0.10462  
0.79685  
0.65193  
0.39956  
0.44285  
0.47003  
0.99765  
0.87518  
0.97653  
0.94102  
0.93383  
0.98356  
0.53421  
0.48873  
0.99404  
0.16404  
0.20421  
0.65814  
0.98656  
0.59839  
0.56586

0.87555  
0.57072  
0.87717  
0.68842  
0.79969  
0.2185  
0.095513  
0.97811  
0.51947  
0.27696  
0.18965  
0.899  
0.0018083  
0.23299  
0.0037607  
0.91412  
0.19791  
0.69422  
0.63394  
0.92939  
0.40986  
0.068454  
0.84959  
0.9536  
0.074198  
0.89055  
0.9666  
0.61588  
0.70612  
0.78723  
0.91476  
0.91433  
0.36467  
0.75855  
0.85662  
0.83849  
0.85137  
0.00025522  
0.59568  
0.99053  
0.18999  
0.93983  
0.91873  
0.88996  
1.07E-05  
0.91476  
0.94456

0.52233  
0.72337  
0.938  
4.35E-05  
0.85729  
0.78352  
0.79628  
0.009682  
0.026122  
0.074571  
0.79529  
0.907  
0.3521  
0.83945  
0.85349  
0.8523  
0.71548  
0.3868  
0.46522  
0.78115  
0.59867  
0.60827  
0.38583  
0.52728  
3.10E-09  
0.0938  
0.53638  
0.53896  
0.51947  
0.87842  
0.71856  
0.27633  
0.49951  
0.91785  
0.73399  
0.95275  
0.18022  
0.67666  
0.51947  
0.8523  
0.074214  
0.013464  
0.15806  
0.92939  
0.60083  
0.8018  
0.72011

0.99683  
0.011454  
0.20889  
0.68626  
0.78826  
0.00045909  
0.94263  
0.93937  
0.30628  
0.23019  
0.015549  
0.0050994  
0.94631  
0.77786  
0.47869  
0.25807  
0.58858  
0.907  
0.81984  
0.36467  
0.08733  
0.002428  
0.40209  
0.36962  
0.62138  
0.73909  
0.98356  
0.0088364  
0.68734  
0.92231  
0.8083  
0.71437  
0.74445  
0.00019603  
0.57284  
0.99983  
0.97268  
0.29257  
0.24011  
0.11162  
0.29228  
0.98149  
0.76885  
0.94128  
0.92916  
0.94688  
0.75855

0.48522  
0.82545  
0.99211  
0.97754  
0.11036  
0.93881  
0.97827  
0.93866  
0.87236  
0.081074  
0.19317  
0.92272  
0.60102  
0.94635  
0.70597  
0.98149  
4.60E-06  
0.8902  
0.89194  
0.059107  
0.99045  
0.45901  
0.7772  
0.78231  
6.26E-14  
0.42287  
0.74514  
0.046161  
0.18482  
0.98596  
0.30339  
0.50167  
0.082577  
0.17204  
0.57249  
0.67343  
0.43428  
0.70233  
0.76358  
0.97166  
0.78352  
0.68539  
0.76547  
0.0057255  
0.97017  
0.907  
0.23167

0.9666  
0.75553  
0.98872  
0.5397  
0.0028861  
0.96456  
0.16554  
0.57596  
0.65167  
0.93937  
0.92393  
0.7  
0.32449  
0.63732  
0.0053736  
0.40154  
0.3868  
0.55758  
0.97858  
0.94454  
0.45797  
0.010542  
0.91503  
0.70684  
0.96149  
0.0073617  
0.628  
0.8523  
0.66261  
0.96394  
0.99824  
0.62138  
0.20165  
0.00038155  
0.071051  
0.69875  
0.057243  
0.76534  
0.047812  
0.95275  
0.76138  
0.7821  
0.027051  
0.65995  
0.96424  
0.85709  
0.81054



0.47003  
4.08E-13  
3.32E-06  
9.07E-07  
0.72226  
0.039425  
0.95652  
0.4967  
0.92194  
0.8328  
0.94438  
0.907  
0.98017  
0.17178  
0.73316  
0.013247  
0.11246  
0.90708  
0.42942  
0.53542  
0.54878  
0.83018  
0.67992  
0.67343  
0.40172  
0.38144  
0.91906  
0.98418  
0.98596  
0.64865  
0.61412  
0.94402  
0.97325  
0.81835  
0.10871  
0.55338  
0.79969  
0.47003  
0.82424  
0.62156  
0.00085982  
0.54498  
0.30896  
0.016025  
0.87867  
0.66306  
0.38606

0.024798  
0.94523  
0.00054668  
0.86994  
0.73909  
0.84474  
0.88096  
0.69598  
0.33852  
0.9875  
0.70872  
1.96E-05  
0.79969  
0.68872  
0.92997  
0.85137  
0.98149  
0.95676  
0.67198  
0.20623  
0.45881  
0.73316  
0.75176  
0.394  
0.60619  
0.99683  
0.76861  
2.25E-07  
0.49719  
0.55758  
0.88664  
0.014675  
0.39762  
0.66386  
0.81894  
3.72E-10  
0.65282  
0.92759  
0.53639  
0.93158  
0.63675  
0.28265  
0.9666  
0.9945  
0.97631  
0.23299  
0.52565

0.90743  
0.87072  
0.28298  
0.075958  
0.9852  
0.85464  
0.54878  
0.25807  
0.82814  
0.017768  
0.9464  
0.91321  
0.61346  
0.50958  
0.7857  
0.64865  
0.52712  
0.98596  
0.32792  
0.32452  
0.99765  
0.83209  
0.84684  
0.68872  
0.50855  
0.08211  
0.4446  
0.78826  
0.98468  
0.94921  
0.64176  
0.67623  
0.83878  
0.25807  
0.84705  
0.94799  
0.68872  
0.87631  
0.66658  
0.74705  
0.026247  
0.53993  
0.93722  
0.96456  
7.11E-06  
0.60619  
0.71587

0.65598  
0.84262  
0.80903  
0.57284  
0.28068  
0.95456  
1.63E-05  
0.50958  
0.96266  
0.98149  
0.51693  
0.77441  
0.0018953  
0.25359  
0.75117  
0.96644  
0.028814  
0.84262  
0.87963  
0.25254  
0.026072

| <b>miRNA linked with miR-133</b> | <b>miR-133 locus</b> | <b>WTvsTKO_DM_Log2FC</b> | <b>padj</b> |
|----------------------------------|----------------------|--------------------------|-------------|
| miR-1a-1                         | miR-133a-2-3p        | -2.339982412             | 0.112667348 |
|                                  | miR-133a-2-5p        | 1.141813076              | 0.998694198 |
| miR-1a-2                         | miR-133a-3p          | 1.865452036              | 0.998694198 |
| miR-206                          | miR-133b-3p          | -1.736178383             | 0.998694198 |
|                                  | miR-133b-5p          | -1.423375103             | 0.998694198 |
